# Supplementary material
Source: publisher figshare collection journal article supplement (https://tandf.figshare.com/ndownloader/files/7738468)
Supplement: Supplementary file 1 [file 7738468]

## Sheet: WaterLevel
Time(s)	P1(cm)	P2(cm)	P3(cm)	P4(cm)	P5(cm)	P6(cm)	P7(cm)	P8(cm)	P9(cm)	P10(cm)
0	30.02	30.04	9.97	9.98	9.99	9.97	9.97	9.98	9.97	9.98
1	30.02	30.04	9.97	9.98	9.99	9.97	9.97	9.98	9.97	9.98
2	30.02	30.04	9.97	9.98	9.99	9.97	9.97	9.98	9.97	9.98
3	30.02	30.04	9.97	9.98	9.99	9.97	9.97	9.98	9.97	9.98
4	30.02	30.04	9.97	9.98	9.99	9.97	9.97	9.98	9.97	9.98
5	30.02	30.04	9.97	9.98	9.99	9.97	9.97	9.98	9.97	9.98
6	30.02	30.04	9.97	9.98	9.99	9.97	9.97	9.98	9.97	9.98
7	30.02	30.04	9.97	9.98	9.99	9.97	9.97	9.98	9.97	9.98
8	30.02	30.04	9.97	9.98	9.99	9.97	9.97	9.98	9.97	9.98
9	30.02	30.04	9.97	9.98	9.99	9.97	9.97	9.98	9.97	9.98
10	30.02	30.04	9.97	9.98	9.99	9.97	9.97	9.98	9.97	9.98
11	30.02	30.04	9.97	9.98	9.99	9.97	9.97	9.98	9.97	9.98
12	30.02	30.04	9.97	9.98	9.99	9.97	9.97	9.98	9.97	9.98
13	30.02	30.04	9.97	9.98	9.99	9.97	9.97	9.98	9.97	9.98
14	30.02	30.04	9.97	9.98	9.99	9.97	9.97	9.98	9.97	9.98
15	30.02	30.04	9.97	9.98	9.99	9.97	9.97	9.98	9.97	9.98
16	30.02	30.04	9.97	9.98	9.99	9.97	9.97	9.98	9.97	9.98
17	30.02	30.03	9.97	9.98	9.99	9.97	9.97	9.98	9.97	9.98
18	30.02	30.03	9.97	9.98	9.99	9.97	9.97	9.98	9.97	9.98
19	30.02	30.03	9.97	9.98	9.99	9.97	9.97	9.98	9.98	9.98
20	30.02	30.03	9.97	9.98	9.99	9.97	9.97	9.98	9.98	9.98
21	30.02	30.03	9.97	9.98	9.99	9.97	9.97	9.98	9.98	9.98
22	30.02	30.03	9.97	9.98	9.99	9.97	9.97	9.98	9.98	9.98
23	30.02	30.03	9.97	9.98	9.99	9.97	9.97	9.98	9.98	9.98
24	30.02	30.03	9.97	9.98	9.99	9.97	9.97	9.98	9.98	9.98
25	30.02	30.03	9.97	9.98	9.99	9.97	9.97	9.98	9.98	9.98
26	30.02	30.03	9.97	9.98	9.99	9.97	9.97	9.98	9.98	9.98
27	30.02	30.03	9.97	9.98	9.99	9.97	9.97	9.98	9.98	9.98
28	30.02	30.03	9.97	9.98	9.99	9.97	9.97	9.98	9.98	9.98
29	30.02	30.03	9.97	9.98	9.99	9.98	9.97	9.98	9.98	9.98
30	30.02	30.03	9.97	9.98	9.99	9.98	9.97	9.98	9.98	9.98
31	30.02	30.03	9.97	9.98	9.99	9.98	9.97	9.98	9.98	9.98
32	30.02	30.03	9.97	9.98	9.99	9.98	9.97	9.98	9.98	9.98
33	30.02	30.03	9.97	9.98	9.99	9.98	9.97	9.98	9.98	9.98
34	30.02	30.03	9.97	9.98	9.99	9.98	9.97	9.98	9.98	9.98
35	30.02	30.03	9.97	9.99	9.99	9.98	9.97	9.98	9.98	9.98
36	30.02	30.03	9.97	9.99	9.99	9.98	9.98	9.98	9.98	9.98
37	30.01	30.03	9.97	9.99	9.99	9.98	9.98	9.99	9.98	9.98
38	30.01	30.03	9.97	9.99	9.99	9.98	9.98	9.99	9.98	9.98
39	30.01	30.03	9.97	9.99	9.99	9.98	9.98	9.99	9.98	9.98
40	30.01	30.03	9.97	9.99	9.99	9.98	9.98	9.99	9.98	9.98
41	30.01	30.03	9.97	9.99	9.99	9.98	9.98	9.99	9.98	9.99
42	30.01	30.03	9.97	9.99	9.99	9.98	9.98	9.99	9.98	9.99
43	30.01	30.03	9.97	9.99	9.99	9.98	9.98	9.99	9.98	9.99
44	30.01	30.03	9.99	9.99	9.99	9.98	9.98	9.99	9.98	9.99
45	30.01	30.03	9.99	9.99	9.99	9.98	9.98	9.99	9.98	9.99
46	30.01	30.03	9.99	9.99	9.99	9.98	9.98	9.99	9.98	9.99
47	30.01	30.03	9.99	9.99	9.99	9.98	9.98	9.99	9.98	9.99
48	30.01	30.03	9.99	9.99	9.99	9.98	9.98	9.99	9.98	9.99
49	30.01	30.03	9.99	9.99	9.99	9.98	9.98	9.99	9.98	9.99
50	30.01	30.03	9.99	9.99	9.99	9.98	9.98	9.99	9.98	9.99
51	30.01	30.03	9.99	9.99	9.99	9.98	9.98	9.99	9.98	9.99
52	30.01	30.03	9.99	9.99	9.99	9.98	9.98	9.99	9.98	9.99
53	30.01	30.03	9.99	9.99	9.99	9.98	9.98	9.99	9.98	9.99
54	30.01	30.03	9.99	9.99	9.99	9.98	9.98	9.99	9.98	9.99
55	30.01	30.03	9.99	9.99	9.99	9.98	9.98	9.99	9.98	9.99
56	30.01	30.03	9.99	9.99	9.99	9.98	9.98	9.99	9.98	9.99
57	30.01	30.03	9.99	9.99	9.99	9.98	9.98	9.99	9.98	9.99
58	30.01	30.03	9.99	9.99	9.99	9.98	9.98	9.99	9.98	9.99
59	30.01	30.03	9.99	9.99	9.99	9.98	9.98	9.99	9.98	9.99
60	30.01	30.03	9.99	9.99	9.99	9.98	9.99	9.99	9.98	9.99
61	30.01	30.01	9.99	9.99	9.99	9.98	9.99	9.99	9.98	9.99
62	30.01	30.01	9.99	9.99	9.99	9.98	9.99	9.99	9.98	9.99
63	30.01	30.01	9.99	9.99	9.99	9.98	9.99	9.99	9.98	9.99
64	30.01	30.01	9.99	9.99	10	9.99	9.99	9.99	9.98	9.99
65	30	30.01	9.99	9.99	10	9.99	9.99	9.99	9.99	9.99
66	30	30.01	9.99	9.99	10	9.99	9.99	9.99	9.99	9.99
67	30	30.01	9.99	9.99	10	9.99	9.99	9.99	9.99	9.99
68	30	30.01	9.99	9.99	10	9.99	9.99	9.99	9.99	9.99
69	30	30.01	9.99	9.99	10	9.99	9.99	9.99	9.99	9.99
70	30	30.01	9.99	9.99	10	9.99	9.99	9.99	9.99	9.99
71	30	30.01	9.99	9.99	10	9.99	9.99	9.99	9.99	9.99
72	30	30.01	10	9.99	10	9.99	9.99	9.99	9.99	9.99
73	30	30.01	10	9.99	10	9.99	9.99	9.99	9.99	9.99
74	30	30.01	10	9.99	10	10	9.99	9.99	9.99	9.99
75	30	30.01	10	9.99	10	10	9.99	9.99	10	9.99
76	30	30.01	10	9.99	10	10	9.99	9.99	10	9.99
77	30	30.01	10	10	10	10	9.99	9.99	10	9.99
78	30	30.01	10	10	10	10	9.99	10	10	9.99
79	30	30.01	10	10	10	10	9.99	10	10	9.99
80	30	30.01	10	10	10	10	9.99	10	10	9.99
81	30	30.01	10	10	10	10	10	10	10	9.99
82	30	30	10	10	10	10	10	10	10	9.99
83	30	30	10	10	10	10	10	10	10	10
84	30	30	10	10	10	10	10	10	10	10
85	30	30	10	10	10	10	10	10	10	10
86	30	30	10	10	10	10	10	10	10	10
87	30	30	10	10	10	10	10	10	10	10
88	30	30	10	10	10	10	10	10	10	10
89	30	30	10	10	10	10	10	10	10	10
90	30	30	10	10	10	10	10	10	10	10
91	30	30	10	10	10	10	10	10	10	10
92	30	30	10	10	10	10	10	10	10	10
93	30	30	10	10	10	10	10	10	10	10
94	30	30	10	10	10	10	10	10	10	10
95	30	30	10	10	10	10	10	10	10	10
96	30	30	10	10	10	10	10	10	10	10
97	30	30	10	10	10	10	10	10	10	10
98	30	30	10	10	10	10	10	10	10	10
99	30	30	10	10	10	10	10	10	10	10
100	30	30	10	10	10	10	10	10	10	10
101	30	29.96	10.06	10.01	10.01	10	10.01	10	10	10
102	30	29.91	10.13	10.06	10.1	10.05	10.17	10.05	10	10
103	30	29.86	10.2	10.19	10.2	10.19	10.34	10.2	10	10
104	30	29.66	10.24	10.31	10.3	10.32	10.51	10.34	10.03	10
105	30	29.39	10.25	10.43	10.39	10.46	10.69	10.49	10.26	10
106	30	29.13	10.26	10.55	10.49	10.59	10.86	10.63	10.48	10
107	30	28.87	10.27	10.69	10.66	10.74	11.06	10.83	10.67	10
108	30	28.61	10.28	10.82	10.93	10.88	11.29	11.03	10.87	10
109	29.97	28.35	10.29	10.96	11.2	11.03	11.52	11.24	11.11	10
110	29.79	28.07	10.27	11.09	11.47	11.18	11.75	11.44	11.34	10.06
111	29.53	27.79	10.24	11.2	11.74	11.34	11.98	11.66	11.54	10.48
112	29.27	27.51	10.2	11.27	12.01	11.52	12.21	11.91	11.75	10.89
113	29.02	27.23	10.16	11.34	12.23	11.71	12.31	12.16	11.98	11.3
114	28.76	26.95	10.13	11.42	12.46	11.89	12.41	12.41	12.21	11.71
115	28.5	26.67	10.09	11.49	12.68	12.07	12.5	12.65	12.45	12.1
116	28.24	26.42	10.02	11.49	12.9	12.21	12.6	12.75	12.68	12.48
117	27.97	26.18	9.93	11.49	13.13	12.35	12.69	12.82	13	12.88
118	27.71	25.94	9.84	11.48	13.36	12.48	12.83	12.9	13.33	13.28
119	27.44	25.71	9.75	11.48	13.6	12.61	13.05	12.97	13.72	13.72
120	27.18	25.47	9.66	11.51	13.84	12.78	13.28	13.11	14.12	14.15
121	26.91	25.23	9.57	11.63	14.08	13.04	13.51	13.44	14.54	14.57
122	26.69	25.13	9.63	11.75	14.32	13.3	13.74	13.77	14.97	15
123	26.48	25.08	9.78	11.87	14.56	13.56	13.97	14.1	15.43	15.43
124	26.28	25.04	9.93	11.98	14.76	13.82	14.25	14.44	15.9	15.86
125	26.07	24.99	10.08	12.19	14.96	14.01	14.53	14.69	16.19	16.26
126	25.86	24.95	10.23	12.42	15.16	14.2	14.82	14.92	16.49	16.67
127	25.66	24.91	10.39	12.64	15.36	14.38	15.1	15.15	16.77	17.13
128	25.57	24.94	10.53	12.86	15.56	14.57	15.38	15.38	17.06	17.59
129	25.53	25.01	10.66	13.09	15.73	14.76	15.65	15.62	17.35	18.09
130	25.5	25.08	10.8	13.34	15.85	14.97	15.88	15.88	17.65	18.59
131	25.47	25.15	10.93	13.59	15.97	15.17	16.11	16.14	17.95	18.68
132	25.44	25.22	11.07	13.83	16.09	15.38	16.34	16.4	18.26	18.76
133	25.41	25.29	11.21	14.08	16.21	15.59	16.56	16.66	18.56	18.86
134	25.44	25.37	11.54	14.47	16.33	15.89	16.79	17	18.86	18.96
135	25.51	25.46	12	14.88	16.57	16.21	17.26	17.35	19.17	19.1
136	25.58	25.54	12.46	15.28	16.83	16.52	17.77	17.7	19.48	19.24
137	25.65	25.63	12.92	15.69	17.08	16.84	18.27	18.05	19.72	19.38
138	25.72	25.71	13.38	16.06	17.34	17.15	18.78	18.37	19.96	19.52
139	25.79	25.8	13.85	16.39	17.6	17.44	19.29	18.62	20.1	19.63
140	25.86	25.89	14.17	16.72	17.84	17.73	19.66	18.86	20.22	19.73
141	25.92	25.98	14.41	17.05	18.06	18.02	19.78	19.11	20.37	19.84
142	25.98	26.08	14.64	17.39	18.28	18.31	19.91	19.36	20.52	19.95
143	26.05	26.17	14.87	17.58	18.51	18.46	20.04	19.51	20.63	20.08
144	26.11	26.27	15.11	17.74	18.73	18.57	20.17	19.64	20.73	20.21
145	26.17	26.36	15.34	17.9	18.95	18.69	20.3	19.77	20.8	20.37
146	26.24	26.43	15.52	18.06	19.13	18.8	20.38	19.9	20.86	20.54
147	26.3	26.47	15.66	18.2	19.31	18.91	20.45	20.02	20.95	20.65
148	26.36	26.52	15.79	18.3	19.5	19.02	20.53	20.11	21.04	20.76
149	26.43	26.57	15.93	18.4	19.68	19.12	20.6	20.19	21.13	20.82
150	26.49	26.62	16.07	18.49	19.86	19.22	20.68	20.28	21.2	20.87
151	26.55	26.66	16.21	18.59	20.01	19.32	20.75	20.37	21.29	20.93
152	26.6	26.69	16.35	18.69	20.12	19.44	20.8	20.45	21.38	21
153	26.64	26.7	16.49	18.8	20.23	19.56	20.86	20.53	21.44	21.05
154	26.68	26.71	16.64	18.9	20.33	19.67	20.91	20.61	21.49	21.1
155	26.72	26.72	16.78	19	20.44	19.79	20.97	20.68	21.54	21.14
156	26.76	26.74	16.93	19.09	20.55	19.89	21.03	20.76	21.59	21.18
157	26.8	26.75	17.07	19.15	20.61	19.93	21.09	20.81	21.63	21.21
158	26.8	26.76	17.16	19.2	20.67	19.98	21.16	20.86	21.68	21.24
159	26.78	26.76	17.2	19.26	20.72	20.03	21.23	20.91	21.75	21.3
160	26.76	26.77	17.25	19.32	20.78	20.07	21.29	20.96	21.82	21.36
161	26.75	26.78	17.29	19.36	20.84	20.13	21.36	21	21.87	21.39
162	26.73	26.78	17.34	19.39	20.89	20.19	21.41	21.04	21.91	21.41
163	26.71	26.79	17.39	19.43	20.93	20.25	21.41	21.08	21.95	21.42
164	26.63	26.75	17.51	19.46	20.96	20.32	21.42	21.12	21.99	21.42
165	26.51	26.7	17.69	19.49	21	20.36	21.43	21.15	22.02	21.42
166	26.39	26.65	17.86	19.5	21.04	20.34	21.43	21.15	22.05	21.41
167	26.28	26.59	18.04	19.51	21.08	20.33	21.44	21.16	22.06	21.42
168	26.16	26.54	18.22	19.52	21.08	20.31	21.45	21.16	22.06	21.43
169	26.04	26.48	18.4	19.53	21.06	20.3	21.46	21.16	22.05	21.45
170	25.88	26.36	18.55	19.53	21.05	20.27	21.47	21.15	22.02	21.48
171	25.69	26.2	18.67	19.53	21.04	20.24	21.48	21.12	21.99	21.48
172	25.5	26.04	18.79	19.53	21.03	20.21	21.5	21.1	21.97	21.47
173	25.3	25.89	18.91	19.53	20.99	20.18	21.48	21.08	21.94	21.46
174	25.11	25.73	19.03	19.53	20.91	20.15	21.42	21.05	21.9	21.43
175	24.92	25.57	19.15	19.53	20.83	20.12	21.36	21	21.86	21.4
176	24.72	25.34	19.26	19.54	20.75	20.09	21.3	20.95	21.82	21.36
177	24.51	25.06	19.36	19.54	20.66	20.06	21.23	20.9	21.75	21.29
178	24.3	24.79	19.47	19.54	20.58	20.03	21.17	20.85	21.68	21.22
179	24.09	24.51	19.57	19.53	20.51	20	21.09	20.79	21.6	21.15
180	23.88	24.23	19.68	19.52	20.44	19.96	21	20.72	21.52	21.07
181	23.67	23.96	19.78	19.51	20.37	19.92	20.92	20.64	21.38	20.99
182	23.46	23.67	19.83	19.5	20.29	19.88	20.83	20.57	21.22	20.91
183	23.24	23.37	19.83	19.49	20.22	19.83	20.75	20.49	21.08	20.82
184	23.03	23.07	19.83	19.46	20.14	19.77	20.65	20.41	20.96	20.73
185	22.82	22.77	19.82	19.43	20.04	19.7	20.55	20.33	20.85	20.62
186	22.61	22.47	19.82	19.4	19.95	19.63	20.45	20.25	20.74	20.51
187	22.39	22.17	19.82	19.37	19.85	19.57	20.35	20.17	20.62	20.39
188	22.22	21.95	19.76	19.33	19.75	19.52	20.24	20.08	20.51	20.27
189	22.08	21.78	19.65	19.29	19.65	19.48	20.14	19.99	20.39	20.14
190	21.94	21.61	19.55	19.25	19.58	19.44	20.04	19.9	20.27	20.01
191	21.79	21.44	19.44	19.21	19.52	19.4	19.95	19.8	20.15	19.89
192	21.65	21.28	19.33	19.16	19.45	19.35	19.85	19.71	20.05	19.77
193	21.51	21.11	19.22	19.1	19.39	19.28	19.76	19.62	19.94	19.66
194	21.42	20.98	19.15	19.03	19.32	19.21	19.66	19.53	19.83	19.55
195	21.37	20.89	19.09	18.97	19.26	19.14	19.57	19.45	19.73	19.45
196	21.32	20.8	19.03	18.9	19.19	19.07	19.51	19.36	19.63	19.35
197	21.26	20.7	18.97	18.84	19.12	19	19.45	19.28	19.54	19.26
198	21.21	20.61	18.92	18.79	19.04	18.95	19.39	19.21	19.45	19.17
199	21.16	20.52	18.86	18.73	18.97	18.89	19.32	19.13	19.38	19.07
200	21.14	20.48	18.81	18.68	18.9	18.84	19.26	19.06	19.31	18.98
201	21.13	20.49	18.76	18.62	18.84	18.78	19.22	18.99	19.24	18.9
202	21.12	20.49	18.72	18.56	18.79	18.73	19.18	18.94	19.18	18.83
203	21.12	20.5	18.67	18.5	18.73	18.67	19.15	18.89	19.13	18.77
204	21.11	20.5	18.63	18.44	18.67	18.62	19.11	18.84	19.09	18.71
205	21.11	20.5	18.58	18.38	18.62	18.56	19.07	18.79	19.05	18.67
206	21.11	20.54	18.55	18.34	18.57	18.52	19.04	18.75	19.02	18.64
207	21.13	20.6	18.54	18.31	18.54	18.49	19.02	18.72	19	18.6
208	21.15	20.65	18.53	18.28	18.52	18.46	19	18.68	18.98	18.57
209	21.16	20.71	18.51	18.24	18.49	18.43	18.98	18.65	18.96	18.55
210	21.18	20.77	18.5	18.21	18.46	18.4	18.96	18.62	18.96	18.54
211	21.2	20.83	18.48	18.17	18.43	18.38	18.94	18.61	18.96	18.53
212	21.21	20.88	18.47	18.13	18.39	18.35	18.93	18.61	18.97	18.54
213	21.21	20.93	18.46	18.1	18.35	18.33	18.93	18.6	18.97	18.55
214	21.22	20.98	18.45	18.06	18.31	18.31	18.93	18.59	18.98	18.57
215	21.23	21.03	18.44	18.03	18.27	18.29	18.93	18.58	18.99	18.58
216	21.24	21.08	18.43	18.01	18.22	18.27	18.93	18.58	19	18.6
217	21.24	21.14	18.43	17.99	18.2	18.26	18.93	18.58	19.02	18.63
218	21.24	21.17	18.42	17.96	18.2	18.24	18.93	18.58	19.05	18.66
219	21.24	21.18	18.4	17.94	18.19	18.23	18.93	18.58	19.07	18.69
220	21.23	21.2	18.39	17.94	18.19	18.22	18.93	18.59	19.09	18.72
221	21.23	21.22	18.38	17.93	18.19	18.22	18.93	18.59	19.11	18.75
222	21.22	21.24	18.37	17.92	18.19	18.21	18.93	18.6	19.13	18.78
223	21.22	21.26	18.36	17.92	18.19	18.2	18.93	18.61	19.14	18.81
224	21.22	21.25	18.34	17.92	18.18	18.2	18.92	18.62	19.15	18.83
225	21.21	21.23	18.31	17.92	18.18	18.2	18.9	18.63	19.16	18.85
226	21.21	21.21	18.29	17.92	18.17	18.19	18.89	18.64	19.16	18.87
227	21.21	21.18	18.26	17.92	18.17	18.19	18.88	18.65	19.17	18.89
228	21.21	21.16	18.23	17.93	18.17	18.19	18.87	18.66	19.17	18.9
229	21.21	21.14	18.2	17.94	18.21	18.2	18.88	18.66	19.18	18.92
230	21.2	21.12	18.17	17.95	18.25	18.21	18.88	18.67	19.18	18.92
231	21.18	21.1	18.14	17.97	18.29	18.22	18.88	18.68	19.19	18.92
232	21.16	21.08	18.11	17.98	18.32	18.23	18.88	18.68	19.18	18.92
233	21.15	21.07	18.08	18	18.36	18.24	18.88	18.69	19.18	18.92
234	21.13	21.05	18.06	18.01	18.38	18.25	18.87	18.69	19.19	18.9
235	21.11	21.04	18.03	18.03	18.39	18.26	18.85	18.69	19.19	18.89
236	21.08	21.01	18.01	18.04	18.4	18.27	18.84	18.7	19.19	18.88
237	21.03	20.99	18	18.05	18.42	18.28	18.82	18.7	19.18	18.87
238	20.98	20.96	17.99	18.05	18.43	18.28	18.81	18.7	19.17	18.86
239	20.94	20.93	17.98	18.05	18.44	18.28	18.8	18.69	19.16	18.85
240	20.89	20.9	17.97	18.05	18.43	18.28	18.78	18.69	19.15	18.85
241	20.85	20.87	17.96	18.05	18.42	18.28	18.77	18.68	19.13	18.84
242	20.79	20.83	17.95	18.05	18.41	18.28	18.76	18.67	19.12	18.84
243	20.73	20.78	17.95	18.04	18.41	18.27	18.75	18.66	19.1	18.83
244	20.66	20.73	17.94	18.03	18.4	18.26	18.74	18.64	19.08	18.83
245	20.6	20.67	17.93	18.02	18.38	18.26	18.72	18.63	19.06	18.82
246	20.54	20.62	17.92	18.01	18.35	18.25	18.69	18.61	19.04	18.81
247	20.47	20.57	17.91	18	18.33	18.23	18.67	18.6	19.02	18.8
248	20.4	20.5	17.91	17.98	18.31	18.2	18.65	18.58	19.01	18.78
249	20.32	20.43	17.91	17.97	18.29	18.18	18.62	18.56	18.99	18.76
250	20.25	20.36	17.9	17.96	18.26	18.16	18.6	18.55	18.96	18.74
251	20.17	20.29	17.9	17.94	18.24	18.14	18.57	18.53	18.93	18.72
252	20.09	20.22	17.9	17.93	18.21	18.13	18.54	18.51	18.9	18.69
253	20.01	20.15	17.9	17.92	18.19	18.11	18.51	18.49	18.87	18.66
254	19.94	20.06	17.89	17.91	18.16	18.1	18.48	18.46	18.83	18.64
255	19.87	19.97	17.89	17.89	18.14	18.08	18.45	18.44	18.79	18.61
256	19.81	19.88	17.89	17.87	18.11	18.06	18.41	18.41	18.75	18.57
257	19.74	19.78	17.88	17.85	18.08	18.04	18.37	18.38	18.71	18.54
258	19.67	19.69	17.88	17.83	18.06	18.02	18.33	18.35	18.66	18.5
259	19.61	19.59	17.87	17.82	18.03	18	18.29	18.31	18.62	18.46
260	19.53	19.5	17.86	17.79	18	17.97	18.25	18.28	18.57	18.42
261	19.45	19.42	17.84	17.77	17.97	17.95	18.21	18.24	18.53	18.37
262	19.37	19.33	17.82	17.75	17.93	17.93	18.18	18.2	18.47	18.31
263	19.29	19.25	17.8	17.73	17.9	17.9	18.14	18.16	18.42	18.26
264	19.21	19.16	17.78	17.71	17.86	17.88	18.1	18.12	18.38	18.21
265	19.13	19.08	17.76	17.67	17.82	17.85	18.06	18.08	18.33	18.16
266	19.06	19.01	17.74	17.64	17.79	17.82	18.03	18.04	18.27	18.11
267	18.99	18.94	17.71	17.6	17.75	17.79	17.98	18	18.22	18.06
268	18.92	18.88	17.68	17.57	17.72	17.76	17.93	17.95	18.17	18.01
269	18.86	18.82	17.65	17.54	17.68	17.73	17.89	17.91	18.12	17.96
270	18.79	18.75	17.62	17.51	17.65	17.69	17.84	17.87	18.07	17.91
271	18.72	18.69	17.59	17.48	17.62	17.65	17.79	17.82	18.01	17.86
272	18.67	18.62	17.56	17.45	17.58	17.62	17.74	17.78	17.96	17.81
273	18.64	18.56	17.52	17.41	17.54	17.58	17.7	17.74	17.91	17.76
274	18.61	18.49	17.47	17.37	17.5	17.53	17.66	17.68	17.86	17.71
275	18.57	18.43	17.43	17.32	17.45	17.49	17.62	17.63	17.8	17.66
276	18.54	18.36	17.39	17.28	17.41	17.44	17.58	17.57	17.76	17.61
277	18.51	18.3	17.35	17.23	17.37	17.39	17.54	17.51	17.71	17.57
278	18.48	18.25	17.31	17.19	17.34	17.35	17.5	17.47	17.67	17.52
279	18.46	18.22	17.28	17.16	17.31	17.32	17.47	17.43	17.62	17.47
280	18.44	18.19	17.26	17.13	17.28	17.28	17.43	17.39	17.57	17.43
281	18.42	18.15	17.23	17.1	17.26	17.25	17.39	17.36	17.53	17.39
282	18.39	18.12	17.2	17.07	17.23	17.22	17.35	17.32	17.5	17.34
283	18.37	18.09	17.17	17.05	17.2	17.18	17.32	17.29	17.46	17.3
284	18.35	18.07	17.15	17.02	17.18	17.15	17.3	17.27	17.43	17.26
285	18.34	18.06	17.13	16.99	17.15	17.12	17.28	17.24	17.4	17.22
286	18.32	18.05	17.11	16.97	17.13	17.09	17.26	17.21	17.38	17.19
287	18.3	18.05	17.09	16.94	17.1	17.06	17.23	17.18	17.36	17.15
288	18.28	18.04	17.07	16.92	17.08	17.04	17.21	17.16	17.33	17.12
289	18.27	18.03	17.05	16.9	17.05	17.02	17.19	17.13	17.31	17.1
290	18.25	18.02	17.03	16.87	17.03	16.99	17.17	17.1	17.29	17.08
291	18.23	18.02	17.02	16.85	17.01	16.97	17.14	17.07	17.27	17.06
292	18.21	18.02	17	16.83	16.99	16.95	17.12	17.05	17.25	17.05
293	18.19	18.03	16.98	16.8	16.97	16.93	17.1	17.03	17.23	17.04
294	18.18	18.03	16.97	16.78	16.95	16.91	17.07	17.01	17.22	17.03
295	18.16	18.03	16.95	16.75	16.93	16.89	17.06	16.99	17.21	17.02
296	18.14	18.02	16.93	16.74	16.92	16.88	17.05	16.98	17.2	17.02
297	18.11	18.01	16.92	16.73	16.9	16.87	17.04	16.97	17.19	17.01
298	18.09	18	16.9	16.72	16.88	16.86	17.03	16.96	17.19	17
299	18.07	17.99	16.88	16.71	16.87	16.84	17.02	16.95	17.18	17
300	18.04	17.99	16.87	16.7	16.85	16.83	17.01	16.94	17.18	17
301	18.02	17.98	16.85	16.69	16.84	16.83	17	16.93	17.17	16.99
302	18	17.96	16.83	16.68	16.83	16.82	16.98	16.92	17.17	16.99
303	17.99	17.94	16.82	16.67	16.81	16.81	16.97	16.91	17.16	16.99
304	17.97	17.92	16.8	16.66	16.8	16.81	16.96	16.91	17.16	16.99
305	17.96	17.91	16.78	16.65	16.79	16.8	16.95	16.9	17.15	16.99
306	17.95	17.89	16.77	16.64	16.78	16.8	16.94	16.89	17.14	16.99
307	17.93	17.87	16.75	16.64	16.76	16.79	16.94	16.89	17.12	16.99
308	17.92	17.85	16.73	16.63	16.75	16.78	16.93	16.88	17.11	16.99
309	17.9	17.84	16.72	16.63	16.74	16.78	16.92	16.88	17.1	16.98
310	17.88	17.82	16.71	16.63	16.73	16.77	16.92	16.88	17.09	16.97
311	17.86	17.81	16.7	16.63	16.72	16.76	16.91	16.88	17.08	16.96
312	17.84	17.79	16.69	16.62	16.72	16.75	16.91	16.88	17.08	16.95
313	17.82	17.78	16.68	16.62	16.72	16.75	16.9	16.88	17.07	16.93
314	17.8	17.76	16.67	16.62	16.71	16.74	16.89	16.88	17.06	16.92
315	17.78	17.74	16.66	16.62	16.71	16.73	16.89	16.87	17.06	16.9
316	17.75	17.73	16.65	16.62	16.71	16.73	16.88	16.87	17.05	16.89
317	17.73	17.71	16.65	16.61	16.7	16.72	16.87	16.86	17.04	16.88
318	17.71	17.69	16.64	16.61	16.69	16.71	16.87	16.86	17.03	16.87
319	17.69	17.67	16.63	16.6	16.68	16.7	16.86	16.84	17.01	16.86
320	17.66	17.65	16.63	16.58	16.67	16.68	16.85	16.83	17	16.85
321	17.64	17.63	16.62	16.57	16.66	16.67	16.84	16.82	16.99	16.84
322	17.61	17.6	16.61	16.56	16.65	16.66	16.83	16.8	16.98	16.83
323	17.59	17.58	16.6	16.54	16.64	16.64	16.81	16.79	16.96	16.83
324	17.57	17.56	16.59	16.53	16.63	16.63	16.79	16.77	16.94	16.82
325	17.54	17.53	16.58	16.51	16.62	16.62	16.78	16.76	16.93	16.81
326	17.52	17.51	16.57	16.5	16.62	16.6	16.76	16.74	16.91	16.79
327	17.49	17.48	16.56	16.49	16.61	16.59	16.74	16.73	16.9	16.77
328	17.47	17.46	16.54	16.48	16.59	16.58	16.73	16.71	16.88	16.75
329	17.44	17.43	16.53	16.46	16.58	16.56	16.72	16.7	16.87	16.74
330	17.42	17.4	16.52	16.45	16.57	16.55	16.71	16.68	16.85	16.72
331	17.4	17.37	16.51	16.44	16.55	16.54	16.7	16.67	16.84	16.7
332	17.37	17.35	16.49	16.43	16.54	16.53	16.69	16.65	16.82	16.68
333	17.34	17.32	16.48	16.41	16.53	16.52	16.68	16.63	16.81	16.67
334	17.31	17.29	16.46	16.4	16.51	16.51	16.66	16.61	16.79	16.65
335	17.27	17.26	16.45	16.39	16.5	16.5	16.64	16.59	16.77	16.63
336	17.24	17.23	16.43	16.38	16.49	16.49	16.62	16.58	16.75	16.62
337	17.21	17.2	16.42	16.36	16.48	16.47	16.6	16.55	16.73	16.6
338	17.18	17.17	16.4	16.33	16.47	16.45	16.59	16.53	16.7	16.58
339	17.15	17.15	16.38	16.31	16.44	16.43	16.57	16.51	16.67	16.56
340	17.11	17.12	16.36	16.29	16.42	16.41	16.55	16.49	16.64	16.54
341	17.08	17.1	16.34	16.27	16.39	16.39	16.53	16.47	16.62	16.52
342	17.05	17.07	16.32	16.26	16.36	16.38	16.51	16.45	16.6	16.5
343	17.02	17.04	16.31	16.24	16.34	16.36	16.49	16.43	16.58	16.48
344	16.99	17.02	16.29	16.23	16.32	16.34	16.47	16.4	16.56	16.46
345	16.96	16.99	16.27	16.21	16.3	16.32	16.45	16.38	16.54	16.44
346	16.93	16.95	16.25	16.19	16.28	16.3	16.43	16.36	16.52	16.42
347	16.91	16.92	16.23	16.17	16.26	16.28	16.41	16.33	16.5	16.4
348	16.88	16.89	16.21	16.15	16.25	16.26	16.39	16.31	16.47	16.38
349	16.85	16.86	16.19	16.13	16.23	16.23	16.37	16.28	16.45	16.36
350	16.83	16.83	16.17	16.11	16.2	16.21	16.35	16.26	16.43	16.34
351	16.8	16.79	16.15	16.1	16.18	16.19	16.32	16.23	16.4	16.32
352	16.77	16.75	16.13	16.08	16.16	16.17	16.3	16.21	16.38	16.3
353	16.75	16.72	16.11	16.06	16.13	16.16	16.28	16.18	16.35	16.28
354	16.72	16.68	16.1	16.05	16.11	16.14	16.26	16.16	16.32	16.26
355	16.7	16.65	16.08	16.03	16.09	16.12	16.23	16.14	16.3	16.24
356	16.67	16.61	16.06	16.01	16.07	16.09	16.21	16.11	16.27	16.21
357	16.65	16.59	16.04	15.99	16.05	16.07	16.18	16.09	16.25	16.19
358	16.62	16.56	16.02	15.97	16.04	16.05	16.16	16.07	16.22	16.16
359	16.6	16.53	16	15.95	16.02	16.03	16.13	16.05	16.2	16.14
360	16.57	16.5	15.99	15.94	16	16.02	16.11	16.03	16.17	16.11
361	16.54	16.47	15.97	15.93	15.98	16	16.09	16.01	16.15	16.09
362	16.52	16.45	15.95	15.91	15.96	15.99	16.07	15.99	16.12	16.06
363	16.5	16.42	15.94	15.9	15.94	15.97	16.05	15.97	16.1	16.03
364	16.48	16.4	15.92	15.88	15.93	15.95	16.03	15.95	16.07	16.01
365	16.46	16.38	15.9	15.87	15.91	15.94	16.01	15.93	16.05	15.98
366	16.44	16.35	15.88	15.85	15.89	15.92	15.99	15.91	16.03	15.96
367	16.42	16.33	15.87	15.84	15.88	15.9	15.97	15.9	16.01	15.93
368	16.4	16.31	15.85	15.82	15.86	15.88	15.95	15.88	15.99	15.91
369	16.38	16.29	15.83	15.8	15.85	15.87	15.94	15.86	15.96	15.89
370	16.36	16.26	15.81	15.78	15.83	15.85	15.92	15.85	15.94	15.87
371	16.33	16.24	15.8	15.77	15.81	15.84	15.9	15.83	15.92	15.85
372	16.31	16.22	15.78	15.75	15.8	15.82	15.88	15.81	15.9	15.83
373	16.29	16.2	15.76	15.73	15.78	15.8	15.87	15.79	15.88	15.81
374	16.27	16.18	15.75	15.71	15.76	15.79	15.85	15.78	15.87	15.79
375	16.25	16.17	15.73	15.69	15.74	15.77	15.83	15.76	15.85	15.77
376	16.23	16.16	15.71	15.67	15.73	15.75	15.82	15.74	15.83	15.75
377	16.21	16.14	15.69	15.65	15.71	15.73	15.8	15.73	15.82	15.74
378	16.19	16.13	15.67	15.64	15.69	15.71	15.78	15.71	15.8	15.72
379	16.17	16.11	15.66	15.62	15.67	15.69	15.77	15.7	15.79	15.71
380	16.16	16.1	15.64	15.61	15.65	15.67	15.75	15.68	15.77	15.69
381	16.14	16.08	15.63	15.6	15.64	15.65	15.73	15.67	15.76	15.68
382	16.13	16.07	15.61	15.58	15.62	15.64	15.72	15.66	15.74	15.67
383	16.12	16.05	15.6	15.57	15.6	15.63	15.7	15.64	15.73	15.65
384	16.11	16.04	15.59	15.55	15.59	15.62	15.69	15.63	15.72	15.64
385	16.1	16.02	15.57	15.53	15.58	15.6	15.67	15.62	15.71	15.63
386	16.08	16.01	15.56	15.52	15.56	15.59	15.66	15.6	15.7	15.62
387	16.07	15.99	15.55	15.51	15.55	15.57	15.64	15.59	15.68	15.61
388	16.05	15.98	15.53	15.5	15.54	15.56	15.63	15.58	15.67	15.59
389	16.04	15.96	15.52	15.48	15.52	15.54	15.62	15.57	15.66	15.58
390	16.02	15.95	15.51	15.47	15.51	15.52	15.61	15.55	15.65	15.57
391	16.01	15.93	15.5	15.46	15.5	15.51	15.59	15.54	15.64	15.56
392	15.99	15.92	15.48	15.45	15.49	15.5	15.58	15.53	15.62	15.55
393	15.97	15.91	15.47	15.44	15.48	15.49	15.57	15.52	15.61	15.54
394	15.96	15.89	15.46	15.43	15.47	15.48	15.56	15.51	15.6	15.53
395	15.94	15.88	15.45	15.42	15.46	15.47	15.55	15.5	15.59	15.51
396	15.92	15.87	15.44	15.41	15.45	15.46	15.54	15.49	15.58	15.5
397	15.9	15.86	15.43	15.4	15.45	15.45	15.53	15.48	15.57	15.49
398	15.89	15.85	15.42	15.39	15.44	15.44	15.53	15.47	15.57	15.48
399	15.87	15.83	15.41	15.38	15.43	15.43	15.51	15.46	15.56	15.47
400	15.85	15.81	15.4	15.37	15.42	15.42	15.5	15.45	15.55	15.46
401	15.84	15.8	15.39	15.36	15.41	15.41	15.49	15.44	15.54	15.45
402	15.82	15.78	15.38	15.35	15.4	15.4	15.48	15.43	15.53	15.44
403	15.8	15.76	15.37	15.34	15.39	15.39	15.46	15.41	15.51	15.43
404	15.79	15.75	15.35	15.32	15.38	15.37	15.45	15.4	15.5	15.42
405	15.77	15.73	15.34	15.31	15.37	15.36	15.44	15.39	15.49	15.41
406	15.76	15.71	15.33	15.3	15.36	15.35	15.42	15.38	15.48	15.41
407	15.75	15.7	15.32	15.29	15.35	15.34	15.41	15.36	15.47	15.4
408	15.73	15.68	15.31	15.28	15.34	15.33	15.4	15.35	15.45	15.39
409	15.72	15.67	15.3	15.27	15.33	15.32	15.38	15.34	15.44	15.38
410	15.7	15.65	15.29	15.26	15.32	15.31	15.37	15.33	15.43	15.37
411	15.69	15.64	15.28	15.25	15.31	15.3	15.36	15.32	15.42	15.36
412	15.68	15.63	15.27	15.24	15.3	15.29	15.35	15.31	15.41	15.35
413	15.66	15.62	15.27	15.23	15.29	15.28	15.34	15.3	15.4	15.33
414	15.65	15.6	15.26	15.23	15.28	15.27	15.33	15.29	15.39	15.32
415	15.64	15.59	15.25	15.22	15.27	15.27	15.32	15.28	15.38	15.31
416	15.62	15.58	15.24	15.21	15.26	15.26	15.31	15.27	15.36	15.3
417	15.61	15.57	15.23	15.2	15.25	15.25	15.3	15.26	15.35	15.29
418	15.59	15.56	15.22	15.19	15.24	15.24	15.29	15.25	15.34	15.28
419	15.58	15.55	15.21	15.18	15.23	15.23	15.28	15.24	15.33	15.27
420	15.57	15.54	15.21	15.17	15.22	15.22	15.26	15.23	15.32	15.26
421	15.55	15.53	15.2	15.16	15.21	15.21	15.25	15.22	15.31	15.25
422	15.54	15.52	15.19	15.15	15.2	15.2	15.25	15.21	15.29	15.24
423	15.52	15.5	15.17	15.14	15.19	15.19	15.24	15.2	15.28	15.23
424	15.5	15.49	15.16	15.13	15.17	15.18	15.23	15.18	15.27	15.22
425	15.49	15.47	15.15	15.12	15.16	15.16	15.22	15.17	15.26	15.21
426	15.47	15.46	15.14	15.11	15.15	15.15	15.21	15.16	15.25	15.2
427	15.45	15.44	15.12	15.1	15.14	15.14	15.2	15.15	15.24	15.19
428	15.43	15.43	15.11	15.09	15.13	15.13	15.19	15.14	15.23	15.18
429	15.42	15.41	15.1	15.08	15.12	15.12	15.18	15.12	15.22	15.17
430	15.4	15.4	15.09	15.07	15.11	15.11	15.17	15.11	15.2	15.16
431	15.38	15.38	15.08	15.06	15.1	15.1	15.15	15.1	15.19	15.15
432	15.36	15.37	15.07	15.05	15.09	15.09	15.14	15.09	15.18	15.14
433	15.35	15.36	15.06	15.03	15.08	15.08	15.13	15.08	15.17	15.13
434	15.33	15.34	15.05	15.02	15.06	15.06	15.12	15.06	15.16	15.12
435	15.32	15.32	15.04	15.01	15.05	15.05	15.11	15.05	15.15	15.11
436	15.3	15.3	15.02	15	15.04	15.04	15.1	15.04	15.13	15.1
437	15.29	15.28	15.01	14.99	15.02	15.03	15.09	15.03	15.12	15.08
438	15.27	15.26	15	14.98	15.01	15.02	15.07	15.02	15.11	15.07
439	15.26	15.25	14.99	14.97	15	15.01	15.06	15.01	15.09	15.06
440	15.24	15.23	14.98	14.96	14.99	15	15.05	15	15.08	15.05
441	15.23	15.21	14.96	14.95	14.98	14.99	15.03	14.99	15.07	15.04
442	15.21	15.2	14.95	14.94	14.97	14.97	15.02	14.97	15.05	15.02
443	15.19	15.18	14.94	14.93	14.96	14.96	15.01	14.96	15.04	15.01
444	15.18	15.17	14.93	14.92	14.95	14.95	15	14.95	15.03	14.99
445	15.16	15.16	14.92	14.91	14.93	14.94	14.99	14.94	15.02	14.98
446	15.15	15.14	14.91	14.9	14.92	14.93	14.98	14.93	15	14.97
447	15.13	15.12	14.9	14.88	14.91	14.92	14.97	14.92	14.99	14.95
448	15.12	15.11	14.89	14.87	14.9	14.91	14.95	14.91	14.98	14.94
449	15.1	15.09	14.88	14.86	14.89	14.9	14.94	14.9	14.97	14.93
450	15.09	15.08	14.87	14.85	14.87	14.89	14.93	14.88	14.95	14.91
451	15.07	15.06	14.86	14.84	14.86	14.87	14.91	14.87	14.94	14.9
452	15.06	15.04	14.85	14.82	14.85	14.86	14.9	14.86	14.93	14.89
453	15.04	15.03	14.83	14.81	14.84	14.84	14.88	14.85	14.91	14.88
454	15.03	15.02	14.82	14.8	14.82	14.83	14.87	14.83	14.9	14.87
455	15.02	15	14.81	14.79	14.81	14.82	14.86	14.82	14.88	14.85
456	15.01	14.99	14.79	14.78	14.79	14.8	14.84	14.81	14.87	14.84
457	14.99	14.97	14.78	14.77	14.78	14.79	14.83	14.79	14.86	14.83
458	14.98	14.96	14.77	14.76	14.76	14.78	14.82	14.78	14.85	14.81
459	14.97	14.94	14.76	14.74	14.75	14.77	14.81	14.77	14.83	14.8
460	14.95	14.93	14.75	14.73	14.74	14.75	14.79	14.75	14.82	14.79
461	14.94	14.92	14.74	14.72	14.73	14.74	14.78	14.74	14.81	14.78
462	14.92	14.9	14.73	14.71	14.72	14.73	14.77	14.73	14.8	14.76
463	14.91	14.89	14.72	14.69	14.71	14.72	14.75	14.72	14.78	14.75
464	14.9	14.87	14.7	14.68	14.7	14.71	14.74	14.71	14.77	14.74
465	14.88	14.86	14.69	14.67	14.69	14.7	14.73	14.7	14.76	14.73
466	14.87	14.85	14.68	14.66	14.68	14.68	14.72	14.68	14.75	14.71
467	14.85	14.84	14.67	14.65	14.66	14.67	14.71	14.67	14.73	14.7
468	14.84	14.83	14.66	14.64	14.65	14.66	14.7	14.66	14.72	14.69
469	14.83	14.81	14.65	14.63	14.64	14.65	14.69	14.65	14.71	14.67
470	14.81	14.8	14.64	14.62	14.63	14.63	14.68	14.64	14.7	14.66
471	14.81	14.79	14.63	14.61	14.62	14.62	14.66	14.63	14.69	14.65
472	14.8	14.77	14.62	14.6	14.61	14.61	14.65	14.62	14.67	14.64
473	14.79	14.76	14.61	14.59	14.6	14.6	14.64	14.6	14.66	14.62
474	14.78	14.75	14.6	14.58	14.59	14.59	14.63	14.59	14.65	14.61
475	14.77	14.73	14.59	14.57	14.58	14.58	14.62	14.58	14.64	14.6
476	14.76	14.72	14.58	14.55	14.57	14.57	14.61	14.57	14.63	14.59
477	14.75	14.71	14.57	14.54	14.56	14.56	14.6	14.56	14.62	14.58
478	14.74	14.7	14.56	14.53	14.55	14.55	14.59	14.55	14.61	14.57
479	14.72	14.69	14.55	14.52	14.53	14.54	14.58	14.54	14.6	14.56
480	14.71	14.68	14.54	14.5	14.52	14.53	14.57	14.53	14.58	14.55
481	14.7	14.66	14.53	14.49	14.51	14.52	14.56	14.52	14.57	14.54
482	14.69	14.65	14.52	14.48	14.5	14.51	14.55	14.51	14.56	14.53
483	14.68	14.64	14.51	14.47	14.5	14.5	14.54	14.5	14.55	14.52
484	14.67	14.63	14.5	14.46	14.49	14.49	14.53	14.49	14.54	14.51
485	14.66	14.62	14.49	14.45	14.48	14.48	14.51	14.48	14.54	14.49
486	14.65	14.61	14.48	14.44	14.47	14.47	14.5	14.47	14.53	14.48
487	14.64	14.6	14.47	14.43	14.46	14.46	14.49	14.46	14.52	14.47
488	14.63	14.59	14.46	14.42	14.45	14.45	14.48	14.45	14.51	14.46
489	14.62	14.58	14.45	14.4	14.44	14.44	14.48	14.43	14.5	14.45
490	14.61	14.57	14.44	14.39	14.43	14.43	14.47	14.42	14.49	14.44
491	14.6	14.56	14.43	14.39	14.42	14.42	14.46	14.41	14.48	14.43
492	14.59	14.54	14.42	14.38	14.41	14.41	14.45	14.4	14.47	14.43
493	14.58	14.53	14.41	14.37	14.4	14.4	14.44	14.39	14.46	14.42
494	14.57	14.52	14.4	14.37	14.4	14.39	14.43	14.38	14.45	14.41
495	14.56	14.51	14.39	14.36	14.39	14.39	14.42	14.37	14.44	14.4
496	14.55	14.5	14.38	14.35	14.38	14.38	14.41	14.36	14.43	14.4
497	14.54	14.5	14.37	14.34	14.38	14.37	14.4	14.35	14.43	14.39
498	14.53	14.49	14.37	14.33	14.37	14.36	14.39	14.34	14.42	14.38
499	14.52	14.48	14.36	14.33	14.36	14.35	14.38	14.34	14.41	14.37
500	14.51	14.47	14.35	14.32	14.35	14.34	14.38	14.33	14.4	14.36
501	14.5	14.46	14.34	14.32	14.34	14.34	14.37	14.32	14.39	14.35
502	14.49	14.45	14.33	14.32	14.33	14.33	14.36	14.31	14.38	14.35
503	14.49	14.45	14.33	14.31	14.33	14.33	14.35	14.31	14.37	14.34
504	14.48	14.44	14.32	14.3	14.32	14.32	14.35	14.3	14.36	14.33
505	14.47	14.43	14.31	14.29	14.31	14.31	14.34	14.29	14.35	14.32
506	14.46	14.43	14.3	14.29	14.3	14.31	14.33	14.28	14.35	14.31
507	14.45	14.42	14.29	14.28	14.3	14.3	14.32	14.27	14.34	14.31
508	14.44	14.41	14.29	14.27	14.29	14.29	14.31	14.27	14.33	14.3
509	14.43	14.4	14.28	14.26	14.28	14.29	14.3	14.26	14.32	14.29
510	14.42	14.39	14.27	14.25	14.27	14.28	14.3	14.25	14.32	14.29
511	14.41	14.39	14.27	14.25	14.26	14.27	14.29	14.25	14.31	14.28
512	14.4	14.38	14.26	14.24	14.26	14.26	14.29	14.24	14.3	14.27
513	14.39	14.37	14.25	14.23	14.25	14.26	14.28	14.23	14.3	14.27
514	14.39	14.36	14.24	14.22	14.24	14.25	14.27	14.23	14.29	14.26
515	14.38	14.35	14.24	14.21	14.23	14.24	14.26	14.22	14.28	14.25
516	14.37	14.34	14.23	14.2	14.23	14.23	14.26	14.21	14.27	14.24
517	14.36	14.33	14.22	14.19	14.22	14.23	14.25	14.21	14.27	14.23
518	14.36	14.32	14.21	14.19	14.21	14.22	14.24	14.2	14.26	14.23
519	14.35	14.32	14.2	14.18	14.21	14.21	14.23	14.19	14.25	14.22
520	14.34	14.31	14.2	14.17	14.2	14.21	14.23	14.19	14.24	14.21
521	14.33	14.3	14.19	14.17	14.19	14.2	14.22	14.18	14.23	14.2
522	14.32	14.29	14.18	14.16	14.18	14.19	14.21	14.17	14.23	14.2
523	14.31	14.28	14.18	14.15	14.18	14.18	14.21	14.16	14.22	14.19
524	14.3	14.27	14.17	14.15	14.17	14.17	14.2	14.16	14.21	14.18
525	14.29	14.26	14.16	14.14	14.16	14.16	14.19	14.15	14.21	14.18
526	14.28	14.26	14.15	14.13	14.15	14.16	14.19	14.14	14.2	14.17
527	14.27	14.25	14.15	14.13	14.15	14.15	14.18	14.14	14.19	14.16
528	14.27	14.24	14.14	14.12	14.14	14.14	14.17	14.13	14.18	14.16
529	14.26	14.23	14.13	14.12	14.13	14.14	14.16	14.12	14.17	14.15
530	14.25	14.22	14.12	14.12	14.13	14.13	14.15	14.12	14.16	14.14
531	14.25	14.21	14.12	14.11	14.12	14.12	14.14	14.11	14.16	14.13
532	14.24	14.2	14.11	14.1	14.11	14.11	14.14	14.1	14.15	14.12
533	14.23	14.19	14.1	14.09	14.1	14.1	14.13	14.1	14.14	14.12
534	14.22	14.18	14.1	14.09	14.09	14.09	14.12	14.09	14.13	14.11
535	14.22	14.18	14.09	14.08	14.08	14.09	14.12	14.08	14.12	14.1
536	14.21	14.17	14.08	14.08	14.08	14.08	14.11	14.08	14.12	14.09
537	14.2	14.16	14.08	14.07	14.07	14.07	14.1	14.07	14.11	14.09
538	14.19	14.15	14.07	14.07	14.06	14.07	14.09	14.06	14.1	14.08
539	14.18	14.14	14.06	14.07	14.06	14.06	14.09	14.06	14.09	14.08
540	14.17	14.13	14.06	14.06	14.05	14.05	14.08	14.05	14.09	14.07
541	14.16	14.12	14.05	14.05	14.04	14.04	14.07	14.04	14.08	14.06
542	14.15	14.12	14.04	14.04	14.04	14.04	14.06	14.04	14.07	14.06
543	14.14	14.11	14.04	14.03	14.03	14.03	14.05	14.03	14.06	14.05
544	14.13	14.1	14.03	14.02	14.02	14.02	14.05	14.02	14.05	14.04
545	14.12	14.1	14.02	14.02	14.01	14.01	14.04	14.02	14.05	14.03
546	14.11	14.09	14.02	14.01	14.01	14.01	14.04	14.01	14.04	14.03
547	14.1	14.08	14.01	14.01	14	14	14.03	14	14.03	14.02
548	14.09	14.08	14	14	13.99	13.99	14.02	14	14.02	14.01
549	14.08	14.07	13.99	13.99	13.99	13.99	14.02	13.99	14.02	14.01
550	14.08	14.06	13.99	13.98	13.98	13.98	14.01	13.98	14.01	14
551	14.07	14.05	13.98	13.98	13.97	13.97	14	13.98	14	13.99
552	14.06	14.04	13.97	13.97	13.97	13.96	13.99	13.97	14	13.98
553	14.06	14.04	13.96	13.96	13.96	13.96	13.98	13.96	13.99	13.98
554	14.05	14.03	13.96	13.95	13.95	13.95	13.97	13.95	13.98	13.97
555	14.04	14.02	13.95	13.94	13.95	13.94	13.97	13.95	13.98	13.97
556	14.04	14.01	13.94	13.94	13.94	13.94	13.96	13.94	13.97	13.96
557	14.03	13.99	13.93	13.93	13.93	13.93	13.95	13.93	13.96	13.95
558	14.02	13.98	13.92	13.92	13.92	13.92	13.94	13.92	13.95	13.95
559	14.02	13.97	13.91	13.91	13.91	13.91	13.94	13.92	13.95	13.94
560	14.01	13.96	13.9	13.9	13.91	13.9	13.93	13.91	13.94	13.93
561	14	13.95	13.9	13.89	13.9	13.89	13.92	13.9	13.93	13.92
562	13.99	13.95	13.89	13.88	13.89	13.88	13.91	13.89	13.92	13.92
563	13.98	13.94	13.88	13.87	13.88	13.87	13.9	13.89	13.91	13.91
564	13.96	13.93	13.87	13.86	13.87	13.87	13.89	13.88	13.91	13.9
565	13.95	13.92	13.86	13.85	13.87	13.86	13.89	13.87	13.9	13.89
566	13.94	13.91	13.85	13.85	13.86	13.85	13.88	13.86	13.89	13.88
567	13.94	13.9	13.85	13.84	13.85	13.84	13.87	13.86	13.88	13.87
568	13.93	13.89	13.84	13.83	13.84	13.83	13.86	13.85	13.87	13.87
569	13.93	13.88	13.84	13.82	13.83	13.82	13.86	13.84	13.87	13.86
570	13.93	13.88	13.83	13.81	13.82	13.82	13.85	13.83	13.86	13.85
571	13.92	13.87	13.82	13.8	13.82	13.81	13.84	13.82	13.85	13.84
572	13.91	13.86	13.82	13.8	13.81	13.8	13.83	13.82	13.84	13.83
573	13.91	13.85	13.81	13.79	13.81	13.79	13.82	13.81	13.83	13.82
574	13.9	13.84	13.81	13.79	13.8	13.78	13.81	13.8	13.82	13.81
575	13.89	13.83	13.8	13.78	13.79	13.78	13.8	13.79	13.82	13.8
576	13.88	13.82	13.8	13.77	13.79	13.77	13.79	13.79	13.81	13.79
577	13.87	13.82	13.79	13.77	13.78	13.76	13.79	13.78	13.8	13.79
578	13.87	13.81	13.79	13.76	13.77	13.76	13.78	13.77	13.8	13.78
579	13.86	13.8	13.78	13.75	13.76	13.75	13.77	13.76	13.79	13.77
580	13.85	13.79	13.77	13.75	13.76	13.74	13.77	13.75	13.78	13.76
581	13.85	13.78	13.77	13.74	13.75	13.74	13.76	13.75	13.77	13.76
582	13.84	13.77	13.76	13.73	13.74	13.73	13.75	13.74	13.77	13.75
583	13.83	13.77	13.75	13.73	13.74	13.73	13.74	13.73	13.76	13.75
584	13.83	13.76	13.75	13.72	13.73	13.72	13.74	13.72	13.75	13.74
585	13.82	13.75	13.74	13.71	13.72	13.72	13.73	13.71	13.74	13.73
586	13.81	13.74	13.73	13.71	13.72	13.71	13.72	13.7	13.74	13.73
587	13.8	13.74	13.73	13.7	13.71	13.7	13.72	13.7	13.73	13.72
588	13.79	13.73	13.72	13.69	13.7	13.7	13.71	13.69	13.72	13.71
589	13.78	13.72	13.72	13.68	13.69	13.69	13.71	13.68	13.72	13.71
590	13.78	13.72	13.71	13.68	13.69	13.69	13.7	13.68	13.71	13.7
591	13.77	13.71	13.7	13.67	13.68	13.68	13.69	13.67	13.71	13.69
592	13.77	13.71	13.7	13.67	13.67	13.67	13.69	13.66	13.7	13.69
593	13.76	13.7	13.69	13.66	13.67	13.67	13.68	13.66	13.69	13.68
594	13.76	13.69	13.68	13.66	13.66	13.66	13.68	13.65	13.69	13.68
595	13.75	13.69	13.67	13.65	13.66	13.66	13.67	13.65	13.68	13.67
596	13.75	13.68	13.67	13.65	13.65	13.65	13.66	13.64	13.68	13.66
597	13.74	13.68	13.66	13.64	13.64	13.64	13.66	13.63	13.67	13.66
598	13.73	13.67	13.66	13.64	13.64	13.64	13.65	13.63	13.66	13.65
599	13.72	13.67	13.65	13.63	13.63	13.63	13.65	13.62	13.66	13.65
600	13.71	13.66	13.64	13.62	13.62	13.63	13.64	13.62	13.65	13.64
601	13.7	13.66	13.64	13.62	13.61	13.62	13.63	13.61	13.65	13.64
602	13.69	13.65	13.63	13.61	13.61	13.62	13.63	13.61	13.64	13.63
603	13.68	13.65	13.63	13.6	13.6	13.61	13.62	13.6	13.64	13.63
604	13.67	13.64	13.62	13.6	13.6	13.61	13.62	13.6	13.63	13.62
605	13.67	13.63	13.62	13.59	13.59	13.6	13.61	13.59	13.62	13.62
606	13.66	13.62	13.61	13.58	13.58	13.59	13.6	13.59	13.62	13.61
607	13.65	13.62	13.61	13.58	13.58	13.59	13.6	13.58	13.61	13.61
608	13.65	13.61	13.6	13.57	13.57	13.58	13.59	13.58	13.6	13.6
609	13.64	13.6	13.59	13.57	13.57	13.58	13.59	13.57	13.6	13.6
610	13.63	13.6	13.59	13.56	13.56	13.57	13.58	13.56	13.59	13.59
611	13.63	13.59	13.58	13.56	13.55	13.57	13.58	13.56	13.59	13.59
612	13.62	13.59	13.58	13.55	13.55	13.56	13.57	13.55	13.58	13.58
613	13.62	13.58	13.57	13.55	13.54	13.56	13.57	13.54	13.58	13.58
614	13.61	13.57	13.56	13.54	13.53	13.55	13.56	13.54	13.57	13.57
615	13.6	13.57	13.56	13.53	13.53	13.54	13.56	13.53	13.56	13.57
616	13.6	13.56	13.55	13.53	13.53	13.54	13.55	13.52	13.56	13.56
617	13.59	13.56	13.55	13.52	13.52	13.53	13.54	13.52	13.55	13.55
618	13.59	13.55	13.54	13.52	13.52	13.53	13.54	13.51	13.55	13.55
619	13.58	13.55	13.54	13.51	13.51	13.52	13.53	13.5	13.54	13.54
620	13.58	13.54	13.53	13.51	13.51	13.52	13.53	13.5	13.53	13.54
621	13.57	13.54	13.53	13.5	13.5	13.52	13.52	13.49	13.53	13.53
622	13.57	13.54	13.52	13.5	13.5	13.51	13.51	13.48	13.52	13.52
623	13.56	13.53	13.52	13.5	13.49	13.51	13.51	13.48	13.51	13.52
624	13.56	13.53	13.51	13.49	13.49	13.5	13.5	13.47	13.51	13.51
625	13.55	13.52	13.51	13.49	13.48	13.5	13.5	13.47	13.5	13.5
626	13.55	13.52	13.5	13.48	13.48	13.49	13.49	13.46	13.5	13.5
627	13.54	13.51	13.5	13.48	13.47	13.48	13.49	13.45	13.49	13.49
628	13.53	13.51	13.49	13.47	13.47	13.48	13.48	13.45	13.49	13.48
629	13.52	13.5	13.48	13.47	13.46	13.47	13.48	13.44	13.48	13.48
630	13.52	13.5	13.48	13.46	13.46	13.47	13.47	13.44	13.47	13.47
631	13.51	13.49	13.47	13.46	13.45	13.46	13.47	13.43	13.47	13.47
632	13.5	13.48	13.47	13.45	13.45	13.45	13.46	13.43	13.46	13.46
633	13.5	13.48	13.46	13.44	13.44	13.45	13.46	13.42	13.46	13.46
634	13.49	13.47	13.46	13.44	13.43	13.44	13.45	13.42	13.45	13.45
635	13.49	13.47	13.45	13.44	13.43	13.44	13.45	13.41	13.44	13.45
636	13.48	13.46	13.44	13.43	13.42	13.43	13.44	13.41	13.44	13.44
637	13.47	13.46	13.44	13.43	13.42	13.43	13.44	13.4	13.43	13.44
638	13.47	13.45	13.43	13.42	13.41	13.42	13.43	13.4	13.43	13.43
639	13.46	13.44	13.43	13.42	13.41	13.42	13.43	13.39	13.42	13.42
640	13.46	13.44	13.42	13.41	13.4	13.41	13.42	13.39	13.42	13.42
641	13.45	13.43	13.42	13.41	13.4	13.4	13.42	13.39	13.42	13.41
642	13.45	13.42	13.41	13.4	13.39	13.4	13.41	13.38	13.41	13.41
643	13.44	13.42	13.41	13.4	13.39	13.39	13.41	13.38	13.41	13.4
644	13.44	13.41	13.4	13.39	13.38	13.38	13.4	13.37	13.4	13.4
645	13.43	13.41	13.4	13.39	13.38	13.38	13.4	13.37	13.4	13.39
646	13.42	13.4	13.39	13.39	13.37	13.37	13.39	13.36	13.39	13.39
647	13.42	13.39	13.39	13.38	13.37	13.36	13.39	13.36	13.39	13.38
648	13.41	13.39	13.38	13.38	13.36	13.36	13.38	13.35	13.38	13.38
649	13.4	13.38	13.38	13.37	13.36	13.36	13.38	13.35	13.38	13.37
650	13.39	13.38	13.37	13.36	13.36	13.35	13.37	13.34	13.38	13.37
651	13.39	13.37	13.37	13.36	13.35	13.35	13.36	13.34	13.37	13.37
652	13.38	13.37	13.36	13.35	13.35	13.35	13.36	13.34	13.37	13.36
653	13.38	13.36	13.36	13.35	13.34	13.34	13.35	13.33	13.36	13.36
654	13.37	13.36	13.35	13.35	13.34	13.33	13.35	13.33	13.36	13.35
655	13.37	13.35	13.35	13.34	13.34	13.33	13.34	13.32	13.35	13.35
656	13.36	13.35	13.34	13.34	13.33	13.32	13.34	13.32	13.35	13.34
657	13.36	13.34	13.34	13.33	13.33	13.32	13.33	13.31	13.34	13.34
658	13.35	13.34	13.33	13.33	13.32	13.32	13.33	13.31	13.34	13.34
659	13.35	13.33	13.33	13.32	13.32	13.31	13.33	13.31	13.33	13.33
660	13.34	13.32	13.32	13.32	13.31	13.31	13.32	13.3	13.33	13.32
661	13.34	13.32	13.32	13.31	13.31	13.31	13.32	13.3	13.32	13.32
662	13.33	13.31	13.32	13.31	13.31	13.3	13.31	13.29	13.32	13.32
663	13.33	13.31	13.31	13.31	13.3	13.3	13.31	13.29	13.31	13.31
664	13.32	13.3	13.31	13.3	13.3	13.3	13.3	13.28	13.31	13.31
665	13.31	13.3	13.3	13.3	13.29	13.29	13.3	13.28	13.3	13.3
666	13.31	13.29	13.3	13.29	13.29	13.29	13.3	13.27	13.3	13.3
667	13.3	13.29	13.29	13.29	13.28	13.28	13.29	13.26	13.29	13.3
668	13.29	13.28	13.29	13.28	13.28	13.28	13.29	13.26	13.29	13.29
669	13.29	13.28	13.28	13.28	13.27	13.27	13.28	13.25	13.28	13.29
670	13.28	13.28	13.28	13.27	13.26	13.27	13.28	13.25	13.28	13.28
671	13.28	13.27	13.28	13.27	13.26	13.26	13.27	13.24	13.27	13.28
672	13.27	13.27	13.27	13.26	13.25	13.26	13.27	13.24	13.27	13.27
673	13.27	13.27	13.27	13.26	13.25	13.25	13.26	13.23	13.26	13.27
674	13.26	13.27	13.26	13.26	13.24	13.25	13.26	13.23	13.26	13.26
675	13.26	13.26	13.26	13.25	13.24	13.24	13.25	13.22	13.25	13.26
676	13.25	13.25	13.25	13.25	13.23	13.24	13.25	13.22	13.25	13.25
677	13.25	13.25	13.25	13.24	13.23	13.23	13.24	13.21	13.24	13.25
678	13.24	13.24	13.24	13.24	13.22	13.23	13.24	13.21	13.24	13.24
679	13.24	13.24	13.24	13.23	13.21	13.22	13.23	13.21	13.23	13.24
680	13.24	13.23	13.24	13.23	13.21	13.22	13.23	13.2	13.23	13.23
681	13.23	13.23	13.23	13.23	13.2	13.21	13.22	13.2	13.22	13.22
682	13.23	13.22	13.22	13.22	13.2	13.21	13.22	13.19	13.22	13.22
683	13.22	13.22	13.22	13.22	13.2	13.2	13.21	13.19	13.21	13.21
684	13.22	13.22	13.21	13.21	13.19	13.2	13.21	13.18	13.2	13.21
685	13.21	13.21	13.21	13.2	13.19	13.19	13.2	13.18	13.2	13.2
686	13.21	13.21	13.2	13.2	13.18	13.19	13.2	13.17	13.19	13.2
687	13.2	13.21	13.2	13.19	13.18	13.19	13.19	13.17	13.19	13.19
688	13.2	13.2	13.19	13.19	13.17	13.18	13.19	13.17	13.19	13.19
689	13.19	13.2	13.19	13.18	13.17	13.18	13.18	13.16	13.18	13.18
690	13.19	13.19	13.18	13.18	13.16	13.17	13.18	13.16	13.18	13.18
691	13.19	13.19	13.18	13.17	13.16	13.17	13.18	13.15	13.17	13.17
692	13.18	13.19	13.18	13.17	13.16	13.16	13.17	13.15	13.17	13.17
693	13.18	13.18	13.17	13.16	13.15	13.16	13.17	13.14	13.16	13.16
694	13.18	13.18	13.17	13.16	13.15	13.16	13.16	13.14	13.16	13.16
695	13.17	13.17	13.16	13.15	13.15	13.15	13.16	13.13	13.16	13.16
696	13.17	13.17	13.16	13.15	13.15	13.15	13.15	13.13	13.15	13.15
697	13.17	13.16	13.16	13.15	13.14	13.15	13.15	13.13	13.15	13.15
698	13.17	13.16	13.15	13.14	13.14	13.14	13.15	13.12	13.14	13.15
699	13.16	13.15	13.15	13.14	13.13	13.14	13.14	13.12	13.14	13.14
700	13.16	13.15	13.14	13.13	13.13	13.13	13.14	13.11	13.14	13.14
701	13.16	13.14	13.14	13.13	13.12	13.13	13.14	13.11	13.13	13.14
702	13.16	13.13	13.14	13.12	13.12	13.12	13.13	13.1	13.13	13.13
703	13.15	13.13	13.13	13.12	13.11	13.12	13.13	13.1	13.12	13.13
704	13.15	13.12	13.13	13.12	13.11	13.11	13.12	13.1	13.12	13.12
705	13.14	13.12	13.13	13.11	13.11	13.11	13.12	13.1	13.12	13.12
706	13.14	13.11	13.12	13.11	13.11	13.1	13.11	13.09	13.11	13.12
707	13.13	13.11	13.12	13.11	13.1	13.1	13.11	13.09	13.11	13.11
708	13.12	13.1	13.12	13.11	13.1	13.1	13.11	13.09	13.11	13.11
709	13.12	13.1	13.11	13.1	13.1	13.09	13.1	13.09	13.1	13.11
710	13.11	13.09	13.11	13.1	13.09	13.09	13.1	13.08	13.1	13.1
711	13.11	13.09	13.11	13.1	13.09	13.08	13.1	13.08	13.1	13.1
712	13.1	13.08	13.1	13.09	13.09	13.08	13.09	13.08	13.09	13.1
713	13.1	13.08	13.1	13.09	13.08	13.08	13.09	13.08	13.09	13.09
714	13.09	13.08	13.1	13.09	13.08	13.07	13.09	13.07	13.08	13.09
715	13.09	13.07	13.09	13.09	13.07	13.07	13.08	13.07	13.08	13.08
716	13.09	13.07	13.09	13.08	13.07	13.07	13.08	13.07	13.08	13.08
717	13.08	13.06	13.08	13.08	13.07	13.06	13.07	13.06	13.07	13.08
718	13.08	13.06	13.08	13.07	13.06	13.06	13.07	13.06	13.07	13.07
719	13.07	13.06	13.08	13.07	13.06	13.06	13.07	13.05	13.06	13.07
720	13.07	13.05	13.07	13.06	13.05	13.06	13.06	13.05	13.06	13.07
721	13.06	13.05	13.07	13.06	13.05	13.05	13.06	13.04	13.06	13.06
722	13.06	13.05	13.06	13.06	13.04	13.05	13.06	13.04	13.05	13.06
723	13.05	13.04	13.06	13.05	13.04	13.05	13.05	13.03	13.05	13.06
724	13.05	13.04	13.05	13.05	13.04	13.04	13.05	13.03	13.04	13.05
725	13.05	13.04	13.05	13.04	13.03	13.04	13.04	13.03	13.04	13.05
726	13.04	13.03	13.04	13.04	13.03	13.03	13.04	13.02	13.04	13.05
727	13.04	13.03	13.04	13.04	13.02	13.03	13.04	13.02	13.03	13.04
728	13.03	13.03	13.03	13.03	13.02	13.03	13.03	13.02	13.03	13.04
729	13.03	13.02	13.03	13.03	13.02	13.02	13.03	13.01	13.02	13.03
730	13.03	13.02	13.03	13.02	13.01	13.02	13.02	13.01	13.02	13.03
731	13.03	13.02	13.02	13.02	13.01	13.02	13.02	13	13.02	13.02
732	13.03	13.01	13.02	13.02	13	13.01	13.02	13	13.01	13.02
733	13.02	13.01	13.01	13.01	13	13.01	13.01	13	13.01	13.01
734	13.02	13.01	13.01	13.01	13	13	13.01	12.99	13.01	13.01
735	13.02	13	13.01	13	12.99	13	13	12.99	13	13.01
736	13.01	13	13	13	12.99	12.99	13	12.98	13	13
737	13.01	13	13	12.99	12.99	12.99	13	12.98	12.99	13
738	13	12.99	13	12.99	12.98	12.98	12.99	12.97	12.99	12.99
739	13	12.99	13	12.99	12.98	12.98	12.99	12.97	12.99	12.99
740	12.99	12.99	12.99	12.98	12.98	12.98	12.98	12.97	12.98	12.98
741	12.99	12.99	12.99	12.98	12.97	12.97	12.98	12.96	12.98	12.98
742	12.99	12.98	12.99	12.98	12.97	12.97	12.98	12.96	12.98	12.98
743	12.99	12.98	12.98	12.97	12.97	12.97	12.97	12.95	12.97	12.97
744	12.99	12.98	12.98	12.97	12.96	12.96	12.97	12.95	12.97	12.97
745	12.99	12.98	12.98	12.96	12.96	12.96	12.97	12.95	12.96	12.97
746	12.98	12.97	12.97	12.95	12.96	12.95	12.96	12.94	12.96	12.96
747	12.98	12.97	12.97	12.95	12.95	12.95	12.96	12.94	12.95	12.96
748	12.98	12.97	12.97	12.95	12.95	12.95	12.95	12.93	12.95	12.96
749	12.98	12.96	12.96	12.95	12.95	12.94	12.95	12.93	12.95	12.96
750	12.97	12.96	12.96	12.95	12.94	12.94	12.95	12.93	12.95	12.95
751	12.97	12.96	12.96	12.94	12.94	12.94	12.94	12.92	12.94	12.95
752	12.97	12.95	12.96	12.94	12.93	12.93	12.94	12.92	12.94	12.94
753	12.97	12.95	12.95	12.93	12.93	12.93	12.93	12.92	12.93	12.94
754	12.96	12.95	12.95	12.93	12.93	12.92	12.93	12.91	12.93	12.94
755	12.96	12.94	12.95	12.93	12.92	12.92	12.93	12.91	12.93	12.93
756	12.96	12.94	12.94	12.92	12.92	12.92	12.92	12.91	12.92	12.93
757	12.95	12.93	12.94	12.92	12.91	12.91	12.92	12.9	12.92	12.93
758	12.95	12.93	12.93	12.92	12.91	12.91	12.92	12.9	12.92	12.92
759	12.95	12.93	12.93	12.91	12.91	12.91	12.91	12.89	12.91	12.92
760	12.94	12.92	12.93	12.91	12.9	12.9	12.91	12.89	12.91	12.92
761	12.94	12.92	12.92	12.91	12.9	12.9	12.91	12.89	12.91	12.91
762	12.93	12.91	12.92	12.9	12.9	12.9	12.9	12.88	12.9	12.91
763	12.93	12.91	12.92	12.9	12.89	12.9	12.9	12.88	12.9	12.91
764	12.93	12.9	12.91	12.9	12.89	12.89	12.89	12.88	12.9	12.9
765	12.92	12.9	12.91	12.9	12.89	12.89	12.89	12.88	12.9	12.9
766	12.92	12.9	12.91	12.89	12.88	12.89	12.89	12.87	12.89	12.89
767	12.92	12.9	12.9	12.89	12.88	12.88	12.88	12.87	12.89	12.89
768	12.91	12.9	12.9	12.89	12.87	12.88	12.88	12.87	12.89	12.89
769	12.91	12.89	12.9	12.88	12.87	12.88	12.88	12.86	12.89	12.88
770	12.91	12.89	12.89	12.88	12.87	12.87	12.87	12.86	12.88	12.88
771	12.9	12.89	12.89	12.88	12.86	12.87	12.87	12.86	12.88	12.88
772	12.9	12.88	12.88	12.87	12.86	12.86	12.87	12.85	12.88	12.88
773	12.89	12.88	12.88	12.87	12.86	12.86	12.86	12.85	12.87	12.87
774	12.89	12.88	12.88	12.87	12.85	12.86	12.86	12.85	12.87	12.87
775	12.88	12.87	12.87	12.87	12.85	12.85	12.86	12.84	12.87	12.87
776	12.87	12.87	12.87	12.86	12.85	12.85	12.86	12.84	12.86	12.86
777	12.87	12.86	12.87	12.86	12.84	12.85	12.85	12.84	12.86	12.86
778	12.87	12.86	12.86	12.86	12.84	12.84	12.85	12.84	12.86	12.86
779	12.86	12.86	12.86	12.85	12.84	12.84	12.85	12.83	12.85	12.86
780	12.86	12.85	12.86	12.85	12.83	12.84	12.85	12.83	12.85	12.85
781	12.85	12.85	12.85	12.85	12.83	12.83	12.85	12.82	12.85	12.85
782	12.85	12.85	12.85	12.84	12.83	12.83	12.84	12.82	12.84	12.85
783	12.85	12.84	12.85	12.84	12.82	12.83	12.84	12.82	12.84	12.85
784	12.85	12.84	12.84	12.84	12.82	12.82	12.84	12.81	12.84	12.84
785	12.85	12.83	12.84	12.83	12.82	12.82	12.84	12.81	12.83	12.84
786	12.85	12.83	12.84	12.83	12.81	12.81	12.84	12.81	12.83	12.84
787	12.85	12.82	12.83	12.83	12.81	12.81	12.83	12.81	12.83	12.83
788	12.85	12.82	12.83	12.82	12.81	12.81	12.83	12.8	12.82	12.83
789	12.84	12.82	12.83	12.82	12.8	12.8	12.83	12.8	12.82	12.82
790	12.84	12.81	12.82	12.81	12.8	12.8	12.83	12.8	12.82	12.82
791	12.83	12.81	12.82	12.81	12.8	12.8	12.82	12.8	12.81	12.82
792	12.83	12.8	12.82	12.81	12.79	12.8	12.82	12.79	12.81	12.81
793	12.82	12.8	12.81	12.8	12.79	12.79	12.82	12.79	12.81	12.81
794	12.82	12.79	12.81	12.8	12.79	12.79	12.81	12.79	12.8	12.8
795	12.81	12.79	12.81	12.8	12.79	12.79	12.81	12.78	12.8	12.8
796	12.81	12.79	12.8	12.79	12.78	12.79	12.81	12.78	12.8	12.8
797	12.8	12.78	12.8	12.79	12.78	12.78	12.8	12.78	12.79	12.8
798	12.8	12.78	12.8	12.79	12.77	12.78	12.8	12.78	12.79	12.79
799	12.79	12.77	12.8	12.78	12.77	12.78	12.79	12.77	12.79	12.79
800	12.79	12.77	12.79	12.78	12.77	12.78	12.79	12.77	12.79	12.79
801	12.78	12.77	12.79	12.78	12.76	12.77	12.78	12.77	12.78	12.78
802	12.77	12.77	12.79	12.77	12.76	12.77	12.78	12.76	12.78	12.78
803	12.77	12.76	12.79	12.77	12.76	12.77	12.78	12.76	12.78	12.77
804	12.76	12.76	12.79	12.77	12.75	12.77	12.77	12.76	12.78	12.77
805	12.76	12.76	12.78	12.76	12.75	12.77	12.77	12.76	12.77	12.77
806	12.75	12.76	12.78	12.76	12.75	12.76	12.77	12.75	12.77	12.77
807	12.75	12.75	12.78	12.76	12.75	12.76	12.76	12.75	12.77	12.77
808	12.74	12.75	12.78	12.76	12.74	12.76	12.76	12.75	12.76	12.76
809	12.74	12.75	12.77	12.76	12.74	12.75	12.76	12.74	12.76	12.76
810	12.73	12.74	12.77	12.76	12.74	12.75	12.75	12.74	12.75	12.76
811	12.73	12.74	12.77	12.76	12.73	12.75	12.75	12.74	12.75	12.76
812	12.72	12.73	12.76	12.75	12.73	12.75	12.75	12.74	12.75	12.76
813	12.72	12.73	12.76	12.75	12.73	12.74	12.74	12.73	12.75	12.75
814	12.72	12.73	12.76	12.75	12.72	12.74	12.74	12.73	12.74	12.75
815	12.72	12.73	12.75	12.75	12.72	12.74	12.74	12.73	12.74	12.75
816	12.72	12.73	12.75	12.75	12.72	12.73	12.73	12.72	12.74	12.75
817	12.72	12.72	12.74	12.74	12.72	12.73	12.73	12.72	12.73	12.75
818	12.72	12.72	12.74	12.74	12.71	12.73	12.73	12.72	12.73	12.74
819	12.72	12.72	12.74	12.74	12.71	12.72	12.72	12.71	12.73	12.74
820	12.72	12.71	12.73	12.74	12.71	12.72	12.72	12.71	12.72	12.74
821	12.71	12.71	12.73	12.74	12.71	12.72	12.72	12.71	12.72	12.73
822	12.71	12.71	12.73	12.73	12.7	12.72	12.71	12.7	12.72	12.73
823	12.71	12.71	12.73	12.73	12.7	12.71	12.71	12.7	12.71	12.73
824	12.7	12.7	12.72	12.73	12.7	12.71	12.71	12.7	12.71	12.72
825	12.7	12.7	12.72	12.72	12.69	12.71	12.71	12.69	12.71	12.72
826	12.7	12.7	12.72	12.72	12.69	12.7	12.7	12.69	12.7	12.71
827	12.69	12.7	12.72	12.72	12.69	12.7	12.7	12.69	12.7	12.71
828	12.69	12.7	12.72	12.72	12.69	12.7	12.7	12.68	12.7	12.71
829	12.69	12.7	12.72	12.71	12.68	12.69	12.69	12.68	12.7	12.7
830	12.69	12.69	12.71	12.71	12.68	12.69	12.69	12.68	12.69	12.7
831	12.68	12.69	12.71	12.71	12.68	12.69	12.69	12.67	12.69	12.7
832	12.68	12.69	12.71	12.71	12.68	12.69	12.69	12.67	12.69	12.69
833	12.68	12.68	12.7	12.7	12.67	12.68	12.68	12.67	12.68	12.69
834	12.67	12.68	12.7	12.7	12.67	12.68	12.68	12.67	12.68	12.69
835	12.67	12.67	12.7	12.69	12.67	12.67	12.68	12.66	12.68	12.68
836	12.67	12.67	12.69	12.69	12.67	12.67	12.67	12.66	12.68	12.68
837	12.67	12.66	12.69	12.68	12.66	12.67	12.67	12.66	12.67	12.68
838	12.66	12.66	12.69	12.68	12.66	12.67	12.67	12.66	12.67	12.67
839	12.66	12.66	12.69	12.67	12.66	12.66	12.66	12.65	12.67	12.67
840	12.66	12.65	12.68	12.67	12.65	12.66	12.66	12.65	12.67	12.67
841	12.66	12.65	12.68	12.66	12.65	12.66	12.66	12.65	12.66	12.67
842	12.65	12.65	12.68	12.66	12.65	12.66	12.65	12.65	12.66	12.66
843	12.65	12.65	12.68	12.66	12.65	12.65	12.65	12.65	12.66	12.66
844	12.65	12.64	12.67	12.65	12.64	12.65	12.65	12.64	12.65	12.66
845	12.65	12.64	12.67	12.65	12.64	12.65	12.64	12.64	12.65	12.66
846	12.64	12.64	12.67	12.65	12.64	12.64	12.64	12.64	12.65	12.66
847	12.64	12.64	12.66	12.64	12.64	12.64	12.64	12.64	12.64	12.66
848	12.64	12.64	12.66	12.64	12.63	12.64	12.64	12.64	12.64	12.65
849	12.64	12.64	12.66	12.64	12.63	12.64	12.64	12.64	12.64	12.65
850	12.64	12.64	12.65	12.63	12.63	12.64	12.63	12.63	12.64	12.65
851	12.64	12.63	12.65	12.63	12.63	12.63	12.63	12.63	12.63	12.65
852	12.64	12.63	12.65	12.63	12.62	12.63	12.63	12.63	12.63	12.64
853	12.64	12.63	12.65	12.63	12.62	12.63	12.63	12.63	12.63	12.64
854	12.64	12.63	12.65	12.62	12.62	12.63	12.62	12.62	12.63	12.64
855	12.64	12.63	12.65	12.62	12.62	12.63	12.62	12.62	12.63	12.64
856	12.63	12.63	12.64	12.62	12.62	12.62	12.62	12.62	12.62	12.63
857	12.63	12.63	12.64	12.63	12.62	12.62	12.62	12.62	12.62	12.63
858	12.63	12.63	12.64	12.63	12.62	12.62	12.62	12.62	12.62	12.63
859	12.62	12.62	12.64	12.63	12.61	12.62	12.62	12.61	12.62	12.63
860	12.62	12.62	12.64	12.63	12.61	12.62	12.62	12.61	12.61	12.63
861	12.62	12.62	12.64	12.62	12.61	12.61	12.61	12.61	12.61	12.63
862	12.62	12.62	12.63	12.62	12.61	12.61	12.61	12.6	12.61	12.63
863	12.61	12.62	12.63	12.62	12.61	12.61	12.61	12.6	12.61	12.62
864	12.61	12.61	12.63	12.62	12.6	12.61	12.61	12.6	12.61	12.62
865	12.61	12.61	12.62	12.62	12.6	12.61	12.61	12.6	12.6	12.62
866	12.6	12.61	12.62	12.62	12.6	12.61	12.6	12.59	12.6	12.62
867	12.6	12.61	12.62	12.62	12.6	12.6	12.6	12.59	12.6	12.62
868	12.59	12.61	12.62	12.61	12.6	12.6	12.6	12.59	12.6	12.62
869	12.59	12.6	12.62	12.61	12.59	12.6	12.6	12.58	12.6	12.62
870	12.58	12.6	12.62	12.61	12.59	12.6	12.6	12.58	12.6	12.61
871	12.58	12.6	12.62	12.61	12.59	12.59	12.6	12.58	12.59	12.61
872	12.58	12.6	12.62	12.6	12.59	12.59	12.59	12.58	12.59	12.61
873	12.57	12.6	12.61	12.6	12.58	12.59	12.59	12.58	12.59	12.61
874	12.57	12.6	12.61	12.6	12.58	12.59	12.59	12.57	12.59	12.6
875	12.56	12.59	12.61	12.6	12.58	12.58	12.59	12.57	12.59	12.6
876	12.56	12.59	12.61	12.59	12.58	12.58	12.58	12.57	12.58	12.6
877	12.56	12.59	12.6	12.59	12.57	12.58	12.58	12.57	12.58	12.59
878	12.55	12.58	12.6	12.59	12.57	12.58	12.58	12.57	12.58	12.59
879	12.55	12.58	12.6	12.59	12.57	12.57	12.58	12.56	12.58	12.59
880	12.55	12.58	12.6	12.59	12.56	12.57	12.58	12.56	12.57	12.59
881	12.55	12.58	12.59	12.58	12.56	12.57	12.57	12.56	12.57	12.58
882	12.55	12.58	12.59	12.58	12.56	12.57	12.57	12.56	12.57	12.58
883	12.55	12.57	12.59	12.58	12.55	12.56	12.57	12.56	12.57	12.58
884	12.55	12.57	12.59	12.58	12.55	12.56	12.57	12.55	12.56	12.57
885	12.55	12.57	12.58	12.57	12.55	12.56	12.56	12.55	12.56	12.57
886	12.55	12.56	12.58	12.57	12.55	12.56	12.56	12.55	12.56	12.57
887	12.55	12.56	12.58	12.57	12.55	12.56	12.56	12.55	12.55	12.56
888	12.54	12.55	12.57	12.56	12.54	12.55	12.55	12.54	12.55	12.56
889	12.54	12.55	12.57	12.56	12.54	12.55	12.55	12.54	12.55	12.56
890	12.54	12.54	12.57	12.56	12.54	12.55	12.55	12.54	12.55	12.55
891	12.54	12.54	12.56	12.55	12.54	12.55	12.54	12.54	12.54	12.55
892	12.53	12.54	12.56	12.55	12.53	12.54	12.54	12.53	12.54	12.55
893	12.53	12.54	12.55	12.55	12.53	12.54	12.54	12.53	12.54	12.55
894	12.53	12.54	12.55	12.54	12.53	12.54	12.53	12.53	12.53	12.55
895	12.53	12.53	12.55	12.54	12.52	12.54	12.53	12.53	12.53	12.54
896	12.53	12.53	12.54	12.54	12.52	12.53	12.52	12.52	12.53	12.54
897	12.52	12.53	12.54	12.54	12.52	12.53	12.52	12.52	12.52	12.54
898	12.52	12.53	12.54	12.53	12.52	12.53	12.52	12.52	12.52	12.54
899	12.52	12.52	12.53	12.53	12.51	12.52	12.51	12.52	12.52	12.54
900	12.51	12.52	12.53	12.53	12.51	12.52	12.51	12.51	12.52	12.53
901	12.51	12.52	12.53	12.52	12.51	12.52	12.51	12.51	12.51	12.53
902	12.51	12.52	12.52	12.52	12.51	12.52	12.51	12.51	12.51	12.53
903	12.5	12.51	12.52	12.52	12.5	12.51	12.51	12.51	12.51	12.52
904	12.5	12.51	12.52	12.52	12.5	12.51	12.5	12.51	12.51	12.52
905	12.5	12.51	12.52	12.52	12.5	12.51	12.5	12.5	12.5	12.52
906	12.49	12.51	12.52	12.51	12.5	12.51	12.5	12.5	12.5	12.52
907	12.49	12.51	12.52	12.51	12.5	12.51	12.5	12.5	12.5	12.51
908	12.48	12.51	12.52	12.51	12.5	12.5	12.49	12.49	12.5	12.51
909	12.48	12.5	12.52	12.51	12.5	12.5	12.49	12.49	12.5	12.51
910	12.48	12.5	12.51	12.5	12.49	12.5	12.49	12.49	12.49	12.51
911	12.48	12.5	12.51	12.5	12.49	12.5	12.49	12.49	12.49	12.5
912	12.47	12.49	12.51	12.5	12.49	12.49	12.48	12.49	12.49	12.5
913	12.47	12.49	12.51	12.5	12.49	12.49	12.48	12.48	12.49	12.5
914	12.47	12.49	12.5	12.5	12.48	12.49	12.48	12.48	12.49	12.5
915	12.47	12.48	12.5	12.49	12.48	12.49	12.48	12.48	12.48	12.5
916	12.47	12.48	12.5	12.49	12.48	12.48	12.48	12.47	12.48	12.49
917	12.47	12.48	12.5	12.49	12.48	12.48	12.48	12.47	12.48	12.49
918	12.47	12.47	12.5	12.49	12.47	12.48	12.47	12.47	12.48	12.49
919	12.47	12.47	12.5	12.49	12.47	12.48	12.47	12.46	12.48	12.49
920	12.47	12.47	12.49	12.48	12.47	12.48	12.47	12.46	12.47	12.49
921	12.47	12.47	12.49	12.48	12.47	12.47	12.47	12.46	12.47	12.48
922	12.47	12.47	12.49	12.48	12.47	12.47	12.47	12.46	12.47	12.48
923	12.47	12.46	12.49	12.48	12.46	12.47	12.46	12.46	12.47	12.48
924	12.47	12.46	12.48	12.48	12.46	12.47	12.46	12.45	12.47	12.47
925	12.47	12.46	12.48	12.47	12.46	12.47	12.46	12.45	12.46	12.47
926	12.47	12.46	12.48	12.47	12.46	12.46	12.46	12.45	12.46	12.47
927	12.47	12.46	12.47	12.47	12.45	12.46	12.46	12.45	12.46	12.47
928	12.47	12.46	12.47	12.47	12.45	12.46	12.46	12.45	12.46	12.47
929	12.46	12.46	12.47	12.47	12.45	12.46	12.45	12.45	12.46	12.46
930	12.46	12.46	12.47	12.47	12.45	12.46	12.45	12.44	12.45	12.46
931	12.46	12.46	12.46	12.46	12.45	12.46	12.45	12.44	12.45	12.46
932	12.45	12.46	12.46	12.46	12.45	12.45	12.45	12.44	12.45	12.46
933	12.45	12.46	12.46	12.46	12.44	12.45	12.45	12.44	12.45	12.46
934	12.45	12.46	12.46	12.46	12.44	12.45	12.45	12.44	12.44	12.45
935	12.45	12.46	12.46	12.46	12.44	12.45	12.44	12.44	12.44	12.45
936	12.45	12.46	12.46	12.46	12.44	12.45	12.44	12.44	12.44	12.45
937	12.45	12.45	12.46	12.45	12.44	12.45	12.44	12.43	12.44	12.45
938	12.44	12.45	12.45	12.45	12.44	12.45	12.44	12.43	12.44	12.45
939	12.44	12.45	12.45	12.45	12.43	12.44	12.44	12.43	12.44	12.44
940	12.44	12.45	12.45	12.45	12.43	12.44	12.44	12.43	12.44	12.44
941	12.44	12.45	12.45	12.45	12.43	12.44	12.43	12.43	12.43	12.44
942	12.44	12.44	12.45	12.45	12.43	12.44	12.43	12.43	12.43	12.44
943	12.43	12.44	12.44	12.44	12.43	12.44	12.43	12.43	12.43	12.44
944	12.43	12.44	12.44	12.44	12.43	12.43	12.43	12.42	12.43	12.44
945	12.43	12.43	12.44	12.44	12.42	12.43	12.43	12.42	12.43	12.44
946	12.43	12.43	12.44	12.44	12.42	12.43	12.42	12.42	12.43	12.44
947	12.43	12.43	12.44	12.44	12.42	12.43	12.42	12.42	12.42	12.44
948	12.43	12.42	12.43	12.43	12.42	12.43	12.42	12.42	12.42	12.44
949	12.43	12.42	12.43	12.43	12.41	12.42	12.42	12.41	12.42	12.44
950	12.42	12.41	12.43	12.43	12.41	12.42	12.42	12.41	12.42	12.43
951	12.42	12.41	12.43	12.43	12.41	12.42	12.42	12.41	12.42	12.43
952	12.42	12.41	12.43	12.43	12.41	12.42	12.41	12.41	12.42	12.43
953	12.42	12.41	12.43	12.43	12.41	12.42	12.41	12.41	12.41	12.43
954	12.41	12.41	12.43	12.43	12.41	12.42	12.41	12.41	12.41	12.43
955	12.41	12.4	12.42	12.43	12.41	12.42	12.41	12.41	12.41	12.43
956	12.41	12.4	12.42	12.42	12.4	12.41	12.41	12.4	12.41	12.43
957	12.41	12.4	12.42	12.42	12.4	12.41	12.41	12.4	12.41	12.43
958	12.41	12.4	12.42	12.42	12.4	12.41	12.4	12.4	12.41	12.42
959	12.4	12.4	12.42	12.42	12.4	12.41	12.4	12.4	12.4	12.42
960	12.4	12.4	12.42	12.42	12.4	12.41	12.4	12.39	12.4	12.42
961	12.4	12.39	12.42	12.42	12.4	12.41	12.4	12.39	12.4	12.42
962	12.4	12.39	12.42	12.41	12.4	12.41	12.4	12.39	12.4	12.42
963	12.4	12.39	12.41	12.41	12.4	12.4	12.4	12.39	12.4	12.41
964	12.4	12.39	12.41	12.41	12.4	12.4	12.39	12.39	12.4	12.41
965	12.39	12.39	12.41	12.41	12.39	12.4	12.39	12.38	12.39	12.41
966	12.39	12.39	12.41	12.41	12.39	12.4	12.39	12.38	12.39	12.41
967	12.39	12.39	12.41	12.41	12.39	12.4	12.39	12.38	12.39	12.4
968	12.39	12.39	12.4	12.41	12.39	12.4	12.39	12.38	12.39	12.4
969	12.39	12.39	12.4	12.41	12.39	12.4	12.39	12.38	12.39	12.4
970	12.39	12.39	12.4	12.4	12.39	12.39	12.39	12.38	12.39	12.4
971	12.39	12.39	12.4	12.4	12.39	12.39	12.39	12.37	12.39	12.39
972	12.39	12.39	12.39	12.4	12.38	12.39	12.38	12.37	12.39	12.39
973	12.39	12.39	12.39	12.4	12.38	12.39	12.38	12.37	12.38	12.39
974	12.39	12.39	12.39	12.4	12.38	12.39	12.38	12.37	12.38	12.39
975	12.39	12.39	12.39	12.4	12.38	12.39	12.38	12.37	12.38	12.38
976	12.39	12.39	12.39	12.4	12.38	12.39	12.38	12.37	12.38	12.38
977	12.39	12.39	12.39	12.39	12.38	12.39	12.38	12.37	12.38	12.38
978	12.39	12.39	12.39	12.39	12.37	12.38	12.38	12.37	12.38	12.38
979	12.39	12.39	12.39	12.39	12.37	12.38	12.38	12.37	12.37	12.37
980	12.39	12.39	12.38	12.39	12.37	12.38	12.37	12.37	12.37	12.37
981	12.38	12.39	12.38	12.39	12.36	12.38	12.37	12.36	12.37	12.37
982	12.38	12.38	12.38	12.38	12.36	12.38	12.37	12.36	12.37	12.37
983	12.38	12.38	12.38	12.38	12.36	12.37	12.37	12.36	12.37	12.37
984	12.37	12.38	12.38	12.38	12.36	12.37	12.37	12.36	12.36	12.37
985	12.37	12.38	12.38	12.37	12.36	12.37	12.37	12.36	12.36	12.37
986	12.37	12.37	12.38	12.37	12.36	12.37	12.37	12.36	12.36	12.36
987	12.36	12.37	12.38	12.37	12.35	12.37	12.37	12.36	12.36	12.36
988	12.36	12.37	12.38	12.37	12.35	12.37	12.37	12.36	12.36	12.36
989	12.35	12.37	12.37	12.37	12.35	12.37	12.37	12.36	12.36	12.36
990	12.35	12.37	12.37	12.37	12.35	12.36	12.36	12.36	12.36	12.36
991	12.35	12.36	12.37	12.37	12.35	12.36	12.36	12.36	12.35	12.36
992	12.34	12.36	12.37	12.37	12.34	12.36	12.36	12.35	12.35	12.36
993	12.34	12.36	12.37	12.37	12.34	12.36	12.36	12.35	12.35	12.36
994	12.33	12.36	12.37	12.37	12.34	12.35	12.36	12.35	12.35	12.36
995	12.33	12.35	12.37	12.37	12.34	12.35	12.36	12.35	12.35	12.36
996	12.33	12.35	12.36	12.36	12.34	12.35	12.35	12.35	12.35	12.35
997	12.32	12.35	12.36	12.36	12.33	12.35	12.35	12.35	12.34	12.35
998	12.32	12.35	12.36	12.36	12.33	12.35	12.35	12.34	12.34	12.35
999	12.31	12.34	12.35	12.36	12.33	12.34	12.34	12.34	12.34	12.35
1000	12.31	12.34	12.35	12.36	12.33	12.34	12.34	12.34	12.34	12.35
1001	12.31	12.34	12.35	12.36	12.33	12.34	12.34	12.34	12.34	12.35
1002	12.31	12.33	12.34	12.35	12.32	12.34	12.34	12.34	12.34	12.35
1003	12.31	12.33	12.34	12.35	12.32	12.33	12.34	12.33	12.34	12.35
1004	12.3	12.32	12.33	12.35	12.32	12.33	12.33	12.33	12.33	12.34
1005	12.3	12.32	12.33	12.35	12.32	12.33	12.33	12.33	12.33	12.34
1006	12.3	12.32	12.33	12.34	12.32	12.33	12.33	12.32	12.33	12.34
1007	12.3	12.32	12.33	12.34	12.31	12.32	12.32	12.32	12.33	12.34
1008	12.31	12.31	12.32	12.34	12.31	12.32	12.32	12.32	12.32	12.34
1009	12.31	12.31	12.32	12.34	12.31	12.32	12.32	12.31	12.32	12.34
1010	12.31	12.31	12.32	12.33	12.31	12.32	12.31	12.31	12.32	12.33
1011	12.31	12.31	12.32	12.33	12.31	12.31	12.31	12.31	12.32	12.33
1012	12.3	12.31	12.32	12.33	12.3	12.31	12.31	12.3	12.31	12.33
1013	12.3	12.3	12.31	12.32	12.3	12.31	12.31	12.3	12.31	12.32
1014	12.3	12.3	12.31	12.32	12.3	12.31	12.3	12.3	12.31	12.32
1015	12.3	12.3	12.31	12.32	12.3	12.3	12.3	12.3	12.31	12.32
1016	12.3	12.3	12.31	12.32	12.3	12.3	12.3	12.29	12.3	12.31
1017	12.3	12.3	12.31	12.32	12.3	12.3	12.3	12.29	12.3	12.31
1018	12.31	12.29	12.31	12.31	12.3	12.3	12.29	12.29	12.3	12.31
1019	12.31	12.29	12.31	12.31	12.3	12.3	12.29	12.28	12.29	12.3
1020	12.31	12.29	12.31	12.31	12.29	12.3	12.29	12.28	12.29	12.3
1021	12.31	12.29	12.31	12.31	12.29	12.3	12.29	12.28	12.29	12.3
1022	12.31	12.29	12.31	12.3	12.29	12.29	12.29	12.27	12.28	12.29
1023	12.31	12.29	12.3	12.3	12.29	12.29	12.28	12.27	12.28	12.29
1024	12.31	12.29	12.3	12.3	12.29	12.29	12.28	12.27	12.28	12.29
1025	12.31	12.29	12.3	12.3	12.29	12.29	12.28	12.27	12.28	12.28
1026	12.31	12.28	12.3	12.29	12.28	12.29	12.28	12.27	12.28	12.28
1027	12.3	12.28	12.3	12.29	12.28	12.29	12.28	12.27	12.28	12.28
1028	12.3	12.28	12.29	12.29	12.28	12.29	12.28	12.26	12.27	12.28
1029	12.3	12.28	12.29	12.29	12.28	12.28	12.27	12.26	12.27	12.27
1030	12.3	12.28	12.29	12.28	12.28	12.28	12.27	12.26	12.27	12.27
1031	12.3	12.28	12.29	12.28	12.28	12.28	12.27	12.26	12.27	12.27
1032	12.3	12.27	12.28	12.28	12.28	12.28	12.27	12.26	12.27	12.27
1033	12.3	12.27	12.28	12.28	12.28	12.28	12.27	12.26	12.27	12.27
1034	12.29	12.27	12.28	12.28	12.28	12.28	12.27	12.26	12.26	12.27
1035	12.29	12.27	12.28	12.27	12.27	12.27	12.27	12.26	12.26	12.27
1036	12.29	12.27	12.28	12.27	12.27	12.27	12.26	12.25	12.26	12.27
1037	12.29	12.26	12.27	12.27	12.27	12.27	12.26	12.25	12.26	12.27
1038	12.28	12.26	12.27	12.27	12.27	12.27	12.26	12.25	12.26	12.27
1039	12.28	12.26	12.27	12.26	12.27	12.27	12.26	12.25	12.26	12.27
1040	12.28	12.26	12.27	12.26	12.26	12.27	12.26	12.25	12.26	12.26
1041	12.28	12.26	12.27	12.26	12.26	12.26	12.26	12.25	12.26	12.26
1042	12.28	12.26	12.27	12.26	12.26	12.26	12.26	12.25	12.26	12.26
1043	12.28	12.26	12.27	12.26	12.26	12.26	12.26	12.25	12.26	12.26
1044	12.28	12.26	12.27	12.26	12.26	12.26	12.26	12.25	12.26	12.26
1045	12.28	12.26	12.27	12.26	12.25	12.26	12.26	12.25	12.26	12.26
1046	12.28	12.26	12.27	12.25	12.25	12.26	12.26	12.25	12.26	12.26
1047	12.27	12.26	12.27	12.25	12.25	12.26	12.25	12.25	12.25	12.26
1048	12.27	12.25	12.27	12.25	12.25	12.26	12.25	12.25	12.25	12.26
1049	12.27	12.25	12.27	12.25	12.25	12.26	12.25	12.25	12.25	12.25
1050	12.26	12.25	12.27	12.25	12.25	12.25	12.25	12.25	12.25	12.25
1051	12.26	12.25	12.27	12.25	12.24	12.25	12.25	12.24	12.25	12.25
1052	12.26	12.24	12.27	12.25	12.24	12.25	12.25	12.24	12.25	12.25
1053	12.25	12.24	12.27	12.25	12.24	12.25	12.25	12.24	12.25	12.25
1054	12.25	12.24	12.27	12.25	12.24	12.25	12.25	12.24	12.24	12.25
1055	12.24	12.24	12.26	12.25	12.24	12.24	12.24	12.24	12.24	12.25
1056	12.24	12.24	12.26	12.25	12.24	12.24	12.24	12.24	12.24	12.25
1057	12.23	12.24	12.26	12.25	12.24	12.24	12.24	12.24	12.24	12.24
1058	12.23	12.24	12.26	12.25	12.24	12.24	12.24	12.24	12.24	12.24
1059	12.23	12.23	12.25	12.25	12.24	12.24	12.24	12.23	12.24	12.24
1060	12.22	12.23	12.25	12.25	12.24	12.24	12.24	12.23	12.23	12.24
1061	12.22	12.23	12.25	12.25	12.23	12.24	12.24	12.23	12.23	12.24
1062	12.22	12.22	12.25	12.25	12.23	12.23	12.23	12.23	12.23	12.24
1063	12.22	12.22	12.25	12.25	12.23	12.23	12.23	12.23	12.23	12.24
1064	12.22	12.22	12.24	12.25	12.23	12.23	12.23	12.23	12.23	12.24
1065	12.22	12.22	12.24	12.25	12.23	12.23	12.23	12.23	12.23	12.23
1066	12.22	12.22	12.24	12.25	12.23	12.23	12.23	12.23	12.22	12.23
1067	12.22	12.22	12.24	12.25	12.23	12.23	12.23	12.23	12.22	12.23
1068	12.23	12.22	12.24	12.24	12.23	12.23	12.23	12.22	12.22	12.23
1069	12.23	12.22	12.23	12.24	12.23	12.23	12.23	12.22	12.22	12.23
1070	12.23	12.22	12.23	12.24	12.23	12.23	12.22	12.22	12.22	12.23
1071	12.23	12.22	12.23	12.24	12.22	12.23	12.22	12.22	12.22	12.23
1072	12.23	12.22	12.23	12.24	12.22	12.23	12.22	12.22	12.22	12.23
1073	12.23	12.22	12.23	12.24	12.22	12.23	12.22	12.22	12.22	12.23
1074	12.23	12.22	12.23	12.24	12.22	12.23	12.22	12.22	12.22	12.22
1075	12.23	12.22	12.22	12.24	12.22	12.22	12.22	12.22	12.22	12.22
1076	12.23	12.22	12.22	12.23	12.22	12.22	12.22	12.22	12.22	12.22
1077	12.23	12.21	12.22	12.23	12.22	12.22	12.22	12.21	12.21	12.22
1078	12.23	12.21	12.22	12.23	12.21	12.22	12.22	12.21	12.21	12.22
1079	12.23	12.21	12.22	12.23	12.21	12.22	12.21	12.21	12.21	12.22
1080	12.23	12.21	12.22	12.23	12.21	12.22	12.21	12.21	12.21	12.22
1081	12.23	12.21	12.22	12.23	12.21	12.22	12.21	12.21	12.21	12.22
1082	12.23	12.21	12.22	12.22	12.21	12.22	12.21	12.21	12.21	12.22
1083	12.23	12.21	12.22	12.22	12.21	12.22	12.21	12.21	12.21	12.22
1084	12.23	12.21	12.22	12.22	12.21	12.22	12.21	12.21	12.21	12.22
1085	12.22	12.2	12.22	12.22	12.2	12.21	12.21	12.2	12.21	12.22
1086	12.22	12.2	12.22	12.21	12.2	12.21	12.21	12.2	12.2	12.22
1087	12.22	12.2	12.21	12.21	12.2	12.21	12.21	12.2	12.2	12.22
1088	12.22	12.2	12.21	12.21	12.2	12.21	12.21	12.2	12.2	12.22
1089	12.21	12.2	12.21	12.21	12.2	12.21	12.21	12.2	12.2	12.22
1090	12.21	12.19	12.21	12.21	12.2	12.21	12.2	12.2	12.2	12.22
1091	12.21	12.19	12.21	12.21	12.2	12.21	12.2	12.2	12.2	12.22
1092	12.21	12.19	12.21	12.21	12.2	12.21	12.2	12.2	12.2	12.21
1093	12.21	12.19	12.22	12.21	12.2	12.21	12.2	12.2	12.2	12.21
1094	12.21	12.19	12.22	12.21	12.2	12.2	12.2	12.19	12.2	12.21
1095	12.21	12.19	12.21	12.21	12.2	12.2	12.2	12.19	12.2	12.21
1096	12.2	12.19	12.21	12.21	12.2	12.2	12.2	12.19	12.2	12.21
1097	12.2	12.19	12.21	12.21	12.19	12.2	12.19	12.19	12.2	12.21
1098	12.2	12.19	12.21	12.21	12.19	12.2	12.19	12.19	12.19	12.21
1099	12.2	12.19	12.21	12.21	12.19	12.2	12.19	12.19	12.19	12.21
1100	12.19	12.19	12.21	12.21	12.19	12.2	12.19	12.19	12.19	12.21

## Sheet: Bed
Final bed elevations (cm)
X(m)	0.1	0.2	0.3	0.4	0.5	0.6	0.7	0.8	0.9	1	1.1	1.2	1.3	1.4	1.5	1.6	1.7	1.8	1.9	2	2.1	2.2	2.3	2.4	2.5	2.6	2.7	2.8	2.9	3	3.1	3.2	3.3	3.4	3.5	3.6	3.7	3.8	3.9	4	4.1	4.2
-0.6	0.7	0.46	1.13	1.37	1.16	0.68	0.22	-0.43	-0.76	-1.62	-1.43	-1.74	-1.75	-1.67	-1.58	-1.46	-1.31	-1.04	-0.71	-0.67	-0.64	-0.65	-0.71	-0.54	-0.46	-0.44	-0.41	-0.36	-0.29	-0.26	-0.32	-0.35	-0.36	-0.34	-0.31	-0.3	-0.29	-0.24	-0.19	-0.14	-0.11	-0.08
-0.55	0.67	0.5	1.75	2.17	1.74	1.51	0.88	0.51	0.56	0.5	0.49	0.33	-0.86	-1.52	-1.88	-1.72	-1.82	-1.47	-0.9	-0.91	-0.95	-0.7	-0.6	-0.55	-0.53	-0.4	-0.39	-0.31	-0.2	-0.32	-0.44	-0.41	-0.4	-0.38	-0.38	-0.35	-0.32	-0.26	-0.18	-0.15	-0.12	-0.08
-0.5	0.93	0.6	2.56	3.87	3.84	3.54	3.4	3.36	2.96	2.73	2.99	2.84	1.85	0.48	-0.75	-0.67	-0.77	-0.78	-0.47	-0.44	-0.43	-0.4	-0.41	-0.38	-0.29	-0.2	-0.03	-0.11	-0.14	-0.34	-0.45	-0.42	-0.4	-0.4	-0.41	-0.36	-0.36	-0.28	-0.15	-0.14	-0.14	-0.1
-0.45	0.9	0.56	1.75	2.32	3.23	3.44	3.73	4.71	4.81	5.22	5.14	5.18	4.3	2.69	1.63	0.77	0.89	0.22	0.3	0.14	0.03	-0.1	-0.33	-0.3	-0.29	-0.23	-0.16	-0.14	-0.16	-0.17	-0.18	-0.37	-0.32	-0.36	-0.4	-0.38	-0.3	-0.24	-0.13	-0.16	-0.13	-0.07
-0.4	0.59	0	-0.65	0.34	1.19	1.96	3.04	4.29	5.93	6.89	6.85	7.46	6.45	4.65	1.3	1.53	1.39	0.69	0.81	0.55	0.39	0.05	-0.29	-0.38	-0.46	-0.31	-0.23	-0.22	-0.24	-0.22	-0.19	-0.24	-0.29	-0.37	-0.39	-0.35	-0.27	-0.25	-0.2	-0.13	-0.11	-0.06
-0.35	-2.04	-2.83	-2.79	-1.8	-0.54	0.78	2.15	3.86	5.51	7.33	9.38	9.46	8.54	6.51	2.83	0.2	0.46	0.73	0.55	0.3	0.01	-0.21	-0.52	-0.37	-0.22	-0.29	-0.36	-0.34	-0.37	-0.31	-0.37	-0.34	-0.38	-0.37	-0.36	-0.31	-0.28	-0.23	-0.18	-0.12	-0.07	-0.04
-0.3	-4.37	-5.15	-5.29	-4.07	-2.79	-1	0.88	2.16	4.54	6.31	8.4	9.99	8.99	7.97	4.41	0.85	0.04	0.14	0.38	0.31	0.2	-0.15	-0.43	-0.31	-0.15	-0.14	-0.17	-0.21	-0.25	-0.33	-0.41	-0.36	-0.37	-0.35	-0.34	-0.32	-0.28	-0.21	-0.13	-0.1	-0.06	-0.02
-0.25	-6.76	-7.95	-7.62	-6.46	-5.16	-2.61	-0.95	0.64	3.01	5.03	7.19	8.85	9.38	9.6	5.89	2.11	0.41	0.13	0.45	0.29	0.03	-0.18	-0.38	-0.34	-0.35	-0.21	-0.07	-0.18	-0.17	-0.24	-0.28	-0.32	-0.36	-0.36	-0.34	-0.28	-0.26	-0.27	-0.16	-0.12	-0.08	-0.03
-0.2	-9.4	-10.4	-10.26	-9.2	-6.89	-4.56	-2.82	-1.39	0.98	3.04	5.83	7.88	9.25	10.52	7.27	3.25	1.16	0.17	0.45	0.34	0.3	-0.07	-0.44	-0.4	-0.39	-0.25	-0.11	-0.18	-0.27	-0.32	-0.35	-0.42	-0.4	-0.34	-0.32	-0.26	-0.23	-0.21	-0.18	-0.14	-0.1	-0.05
-0.15	-11.56	-13.24	-12.92	-10.79	-8.53	-6.62	-5.28	-3.83	-0.96	1.18	4.31	6.92	8.38	10.07	8.5	3.93	2.18	0.48	0.27	0.31	0.27	-0.05	-0.39	-0.37	-0.34	-0.16	-0.1	-0.16	-0.27	-0.28	-0.28	-0.36	-0.38	-0.31	-0.28	-0.3	-0.27	-0.2	-0.12	-0.1	-0.1	-0.08
-0.1	-13.8	-15.58	-14.72	-13.21	-11.08	-8.78	-6.99	-5.16	-2.48	-0.62	3.05	6.36	7.67	9.4	9.46	4.75	2.92	0.52	0.08	0.2	0.22	-0.05	-0.21	-0.25	-0.23	-0.15	-0.07	-0.16	-0.24	-0.25	-0.31	-0.33	-0.34	-0.28	-0.2	-0.27	-0.34	-0.21	-0.16	-0.09	-0.09	-0.07
-0.05	-15.82	-18.55	-17.5	-15.92	-13.41	-10.83	-8.2	-5.89	-3.25	-1.56	2.48	5.98	7.19	9.17	9.65	5.3	3.5	1.09	0.31	0.32	0.42	-0.04	-0.33	-0.35	-0.34	-0.2	-0.05	-0.14	-0.31	-0.3	-0.3	-0.31	-0.33	-0.25	-0.18	-0.24	-0.31	-0.23	-0.14	-0.08	-0.06	-0.07
0	-16.43	-19.29	-18.74	-16.91	-14.46	-12.11	-8.79	-5.95	-4.08	-1.83	2.45	5.99	7.04	9.08	9.78	5.16	3.26	1.15	0.09	0.07	0.05	-0.13	-0.3	-0.46	-0.34	-0.22	-0.09	-0.16	-0.23	-0.33	-0.43	-0.39	-0.35	-0.25	-0.15	-0.22	-0.29	-0.22	-0.14	-0.1	-0.06	-0.05
0.05	-15.54	-16.68	-17.05	-15.5	-13.99	-11.8	-8.64	-5.48	-3.62	-1.37	2.76	6.13	7.57	9.17	9.77	4.9	3.44	1.09	0.33	0.3	0.44	-0.01	-0.18	-0.37	-0.31	-0.21	-0.07	-0.11	-0.14	-0.32	-0.5	-0.41	-0.28	-0.24	-0.19	-0.28	-0.36	-0.24	-0.17	-0.12	-0.07	-0.08
0.1	-12.93	-14.38	-14.35	-13.19	-11.84	-10.64	-7.84	-4.81	-1.98	-0.33	3.37	6.61	8.4	9.61	9.26	4.97	2.95	1.03	0	0.42	0.72	0.1	-0.05	-0.11	-0.18	-0.11	-0.08	-0.06	-0.04	-0.24	-0.35	-0.29	-0.16	-0.26	-0.26	-0.31	-0.36	-0.26	-0.16	-0.14	-0.1	-0.09
0.15	-10.76	-11.6	-11.95	-10.51	-9.38	-8.33	-6	-3	-1.18	1.25	4.21	7.29	8.91	10.07	8.82	4.27	2.5	0.44	0.52	0.35	0.14	0	-0.14	-0.14	-0.06	-0.05	-0.08	-0.14	-0.19	-0.35	-0.54	-0.33	-0.12	-0.23	-0.34	-0.32	-0.28	-0.2	-0.12	-0.13	-0.09	-0.08
0.2	-8.14	-8.71	-8.9	-8.11	-7.07	-5.9	-3.78	-0.98	0.7	3.31	5.87	8.62	9.5	10.22	7.96	3.68	1.2	0.09	0.36	0.2	0	-0.15	-0.3	-0.2	-0.05	-0.06	-0.11	-0.1	-0.12	-0.22	-0.32	-0.35	-0.38	-0.33	-0.31	-0.27	-0.22	-0.18	-0.12	-0.13	-0.09	-0.07
0.25	-5.66	-5.93	-6.05	-5.84	-5.34	-3.83	-1.82	0.73	2.79	5.17	7.58	8.96	9.9	9.1	6.86	2.69	0.83	0.36	0.38	0.38	0.37	-0.05	-0.12	-0.15	-0.17	-0.11	-0.09	-0.06	-0.02	-0.14	-0.25	-0.28	-0.31	-0.31	-0.32	-0.27	-0.22	-0.15	-0.1	-0.11	-0.06	-0.07
0.3	-3.35	-3.64	-3.87	-3.66	-3.13	-2.09	0.02	2.13	4.41	6.4	9.25	9.5	9.12	8.84	5.75	1.26	0.58	0.77	0.19	0.32	0.49	-0.06	-0.1	-0.06	-0.01	-0.04	-0.07	-0.09	-0.1	-0.19	-0.09	-0.3	-0.37	-0.4	-0.38	-0.39	-0.37	-0.22	-0.13	-0.12	-0.04	-0.05
0.35	-0.68	-1.23	-1.37	-1.44	-0.98	-0.11	1.47	3.32	5.06	7.14	9.49	9.99	9.29	6.91	3.87	0.81	0.83	1.31	0.46	0.37	0.35	0	-0.03	-0.04	-0.01	-0.03	-0.05	-0.11	-0.18	-0.28	-0.38	-0.35	-0.33	-0.34	-0.33	-0.33	-0.33	-0.23	-0.12	-0.1	-0.05	-0.05
0.4	0.77	0.65	0.42	0.93	1.3	1.78	2.94	4.21	5.81	6.83	8.28	7.64	6.96	4.63	2.02	1.76	2.17	1.2	1.19	0.78	0.46	0.06	-0.04	-0.05	-0.04	-0.07	-0.09	-0.07	-0.05	-0.13	-0.21	-0.24	-0.26	-0.29	-0.32	-0.29	-0.16	-0.14	-0.11	-0.07	-0.06	-0.06
0.45	0.57	0.74	1.42	2.87	3.05	3.44	3.59	4.86	5.81	5.09	6.24	5.5	4.6	2.93	1.96	1.15	0.91	0.4	0.77	0.59	0.44	-0.01	-0.15	-0.1	-0.01	-0.07	-0.09	-0.11	-0.08	-0.25	-0.42	-0.28	-0.28	-0.3	-0.35	-0.37	-0.31	-0.15	-0.09	-0.09	-0.08	-0.07
0.5	0.74	0.65	2.45	3.75	4.05	3.85	4.24	4.71	5.1	3.5	4.1	3.39	2.31	0.72	0.03	-0.61	-0.45	-0.41	-0.11	-0.02	0.11	-0.04	-0.11	-0.08	-0.01	-0.09	-0.05	-0.13	-0.1	-0.23	-0.35	-0.28	-0.11	-0.19	-0.27	-0.27	-0.27	-0.19	-0.11	-0.1	-0.07	-0.04
0.55	1.04	0.79	2.05	2.44	2.26	2.56	2.17	1.73	1.91	0.63	1.58	0.69	-0.69	-1.35	-1.07	-1.22	-0.78	-0.54	-0.53	-0.41	-0.28	-0.31	-0.34	-0.24	-0.28	-0.24	-0.21	-0.2	-0.19	-0.25	-0.3	-0.27	-0.23	-0.27	-0.28	-0.26	-0.28	-0.2	-0.15	-0.11	-0.08	-0.04
0.6	1.17	0.9	1.5	1.4	1.39	1.34	1.06	0.2	0.77	-0.54	-0.45	-0.83	-1.6	-1.5	-0.9	-1	-0.2	-0.43	-0.11	-0.18	-0.24	-0.27	-0.3	-0.28	-0.28	-0.3	-0.31	-0.28	-0.24	-0.27	-0.29	-0.29	-0.28	-0.26	-0.24	-0.24	-0.23	-0.18	-0.13	-0.12	-0.09	-0.05
Y(m)
Note: Initial bed elevations are substracted.
